# Supplementary material for: Clinical Guidelines for Drug-Related Peptic Ulcer, 2020 Revised Edition
Source: PubMed Central journal article supplement — Gut Liver. 2020 Nov 15;14(6):707–26. doi: 10.5009/gnl20246 (PMC7667931; doi:10.5009/gnl20246), 2020-11-15
Supplement: GNL-14-707_Supple.pdf [file GNL-14-707_Supple.pdf]

**Supplementary Table. 1.** Clinical Key Questions

---

1. What are the high risk factors of peptic ulcer diseases and their complications in patients taking nonsteroidal anti-inflammatory drugs?
  2. In patients with long-term use of nonsteroidal anti-inflammatory drugs, can *Helicobacter pylori* eradication prevent peptic ulcer diseases and their complications?
  3. In high-risk patients who take long-term nonsteroidal anti-inflammatory drugs, can co-administration of proton pump inhibitors prevent peptic ulcer diseases and their complications?
  4. In high-risk patients who take long-term nonsteroidal anti-inflammatory drugs, can co-administration of misoprostol prevent peptic ulcer diseases and their complications?
  5. In high-risk patients who take long-term nonsteroidal anti-inflammatory drugs, can co-administration of histamine-2 receptor blockers prevent peptic ulcer diseases and their complications?
  6. In high-risk patients who take long-term nonsteroidal anti-inflammatory drugs, can replacement of selective cyclooxygenase-2 inhibitors instead of non-selective nonsteroidal anti-inflammatory drugs prevent peptic ulcer diseases and their complications?
  7. In patients who take long-term low dose aspirin with previous history of peptic ulcer disease, can *H. pylori* eradication prevent peptic ulcer diseases and peptic ulcer bleeding?
  8. In patients who take long-term low dose aspirin with previous history of peptic ulcer bleeding, can co-administration of proton pump inhibitors prevent peptic ulcer diseases and peptic ulcer bleeding?
  9. In patients who take long-term low dose aspirin with peptic ulcer bleeding, when is the optimal time of aspirin resumption?
  10. In patients who take long-term anti-coagulants with peptic ulcer bleeding, when is the optimal time of anti-coagulants resumption?
  11. In patients who take anti-coagulants with high risk of peptic ulcer bleeding, can co-administration of anti-peptic ulcer medications prevent upper gastrointestinal bleeding?
-

**Supplementary Table 2.** Selection of Search Terms

| Headings | Selection of search terms                        |                                                                                                                                                                                                                                                                                                                                                                                                                                                                                                                                                                                                                                                                                                                                                                                                                                                                                                                                                                           |
|----------|--------------------------------------------------|---------------------------------------------------------------------------------------------------------------------------------------------------------------------------------------------------------------------------------------------------------------------------------------------------------------------------------------------------------------------------------------------------------------------------------------------------------------------------------------------------------------------------------------------------------------------------------------------------------------------------------------------------------------------------------------------------------------------------------------------------------------------------------------------------------------------------------------------------------------------------------------------------------------------------------------------------------------------------|
|          | Mesh                                             | PubMed entry terms                                                                                                                                                                                                                                                                                                                                                                                                                                                                                                                                                                                                                                                                                                                                                                                                                                                                                                                                                        |
| NSAID    | “Anti-Inflammatory Agents, Non-Steroidal” [Mesh] | Antiinflammatory Agents, Non Steroidal; Antiinflammatory Agents, Nonsteroidal; Agents,; Nonsteroidal Antiinflammatory; Nonsteroidal Antiinflammatory Agents; Nonsteroidal Anti-Inflammatory Agents; Agents, Nonsteroidal Anti-Inflammatory; Anti-Inflammatory Agents, Nonsteroidal; Nonsteroidal Anti Inflammatory Agents; NSAIDs; Anti; Inflammatory Agents, Nonsteroidal; Non-Steroidal Anti-Inflammatory Agents; Agents, Non-Steroidal Anti-Inflammatory; Non Steroidal Anti Inflammatory Agents; Aspirin-Like Agents; Agents, Aspirin-Like; Aspirin Like Agents; Analgesics, Anti-Inflammatory; Analgesics, Anti Inflammatory; Anti-Inflammatory Analgesics; Anti-Rheumatic Agents, Non-Steroidal; Agents, Non-Steroidal Anti-Rheumatic; Anti Rheumatic Agents, Non Steroidal; Non-Steroidal Anti-Rheumatic Agents; Antirheumatic Agents, Non-Steroidal; Agents, Non-Steroidal Antirheumatic; Antirheumatic Agents, Non Steroidal; Non-Steroidal Antirheumatic Agents |
|          | “Cyclooxygenase 1” [Mesh]                        | Cyclo-Oxygenase I; Cyclo Oxygenase I; Prostaglandin H Synthase-1; Prostaglandin H Synthase 1; COX-1 Prostaglandin Synthase; COX 1 Prostaglandin Synthase                                                                                                                                                                                                                                                                                                                                                                                                                                                                                                                                                                                                                                                                                                                                                                                                                  |
|          | “Cyclooxygenase 2” [Mesh]                        | Prostaglandin Synthase, COX-1; Synthase, COX-1 Prostaglandin; Cyclooxygenase-1<br>Cyclo-Oxygenase II; Cyclo Oxygenase II; PTGS2; PGHS-2; Prostaglandin H Synthase-2; Prostaglandin H Synthase 2; COX-2 Prostaglandin Synthase; COX 2 Prostaglandin Synthase; Prostaglandin Synthase, COX-2; Synthase, COX-2 Prostaglandin; Cyclo-oxygenase-2                                                                                                                                                                                                                                                                                                                                                                                                                                                                                                                                                                                                                              |
|          | “Cyclooxygenase 2 Inhibitors” [Mesh]             | Inhibitors, Cyclooxygenase 2; Cyclooxygenase-2 Inhibitors; Inhibitors, Cyclooxygenase-2; Coxibs; COX-2 Inhibitors; COX 2 Inhibitors; Inhibitors, COX-2; COX2 Inhibitors; Inhibitors, COX2                                                                                                                                                                                                                                                                                                                                                                                                                                                                                                                                                                                                                                                                                                                                                                                 |
|          | “Cyclooxygenase Inhibitors” [Mesh]               | Inhibitors, Cyclo-Oxygenase; Inhibitors, Cyclo Oxygenase; Inhibitors, Cyclooxygenase; Prostaglandin Synthesis Antagonists; Antagonists, Prostaglandin Synthesis; Inhibitors, Prostaglandin-Endoperoxide Synthase; Inhibitors, Prostaglandin Endoperoxide Synthase; Prostaglandin Endoperoxide Synthase Inhibitors; Prostaglandin Synthase Inhibitors; Cyclo-Oxygenase Inhibitors; Cyclo Oxygenase Inhibitors; Inhibitors, Prostaglandin Synthase                                                                                                                                                                                                                                                                                                                                                                                                                                                                                                                          |
|          | “Ibuprofen” [Mesh]                               | I.V. Solution, Ibuprofen; Ibuprofen, (+-)-Isomer; Ibuprofen, (R)-Isomer; Ibuprofen, (S)-Isomer; Ibuprofen, Aluminum Salt; Aluminum Salt Ibuprofen; Ibuprofen, Calcium Salt; Calcium Salt Ibuprofen; Ibuprofen, Copper (2+) Salt; Ibuprofen, Magnesium Salt; Magnesium Salt Ibuprofen; Salt Ibuprofen, Magnesium; Ibuprofen, Potassium Salt; Potassium Salt Ibuprofen; Ibuprofen, Sodium Salt; Salt Ibuprofen, Sodium; Sodium Salt Ibuprofen; Ibuprofen, Zinc Salt; Salt Ibuprofen, Zinc; Zinc Salt Ibuprofen; Ibuprofen-Zinc; Ibuprofen Zinc; IP-82; IP 82; IP82; Motrin; Nuprin; Rufen; Salprofen; Trauma-Dolgit Gel; Trauma Dolgit Gel; TraumaDolgit Gel; Brufen                                                                                                                                                                                                                                                                                                        |
|          | “Naproxen” [Mesh]                                | Methoxypropionicin; MNPA; Anaprox; Naprosin; Naprosyn; Proxen; Synflex; Aleve; Naproxen Sodium; Sodium, Naproxen                                                                                                                                                                                                                                                                                                                                                                                                                                                                                                                                                                                                                                                                                                                                                                                                                                                          |
|          | “Diclofenac” [Mesh]                              | Diclophenac; Dicrofenac; Dichlofenal; Diclofenac Sodium; Sodium Diclofenac; Diclofenac, Sodium; Diclonate P; Feloran; Voltarol; Novapirina; Orthofen; Ortofen; Orthophen; SR-38; SR 38; SR38; Voltaren; Diclofenac Potassium; GP-45,840; GP 45,840; GP45,840                                                                                                                                                                                                                                                                                                                                                                                                                                                                                                                                                                                                                                                                                                              |
|          | “Indomethacin” [Mesh]                            | Indometacin; Amuno; Indocid; Metindol; Indomet 140; Indomethacin Hydrochloride; Hydrochloride, Indomethacin; Osmosin; Indocin                                                                                                                                                                                                                                                                                                                                                                                                                                                                                                                                                                                                                                                                                                                                                                                                                                             |
|          | “Ketoprofen” [Mesh]                              | Benzoylhydratropic Acid; 2-(3-Benzoylphenyl)propionic Acid; Profenid; Alrheumum; Orudis; 19,583 RP; RP, 19,583; RP-19583; RP 19583; RP19583; Alrheumat                                                                                                                                                                                                                                                                                                                                                                                                                                                                                                                                                                                                                                                                                                                                                                                                                    |

**Supplementary Table 2.** Continued

| Headings | Selection of Search Terms                       |                                                                                                                                                                                                                                                                                                                                                                                                                                                                                               |
|----------|-------------------------------------------------|-----------------------------------------------------------------------------------------------------------------------------------------------------------------------------------------------------------------------------------------------------------------------------------------------------------------------------------------------------------------------------------------------------------------------------------------------------------------------------------------------|
|          | Mesh                                            | PubMed Entry Terms                                                                                                                                                                                                                                                                                                                                                                                                                                                                            |
| NSAID    | "nabumetone" [Supplementary Concept]            | Nabumeton; 4-(6-methoxy-2-naphthyl)-2-butanone; Arthrxan; BRL 14777; Gen-Nabumetone; Listran; Relafen; Relif; Relifex; Mebutan; Rhoxal-nabumetone; Apo-Nabumetone; Nabucox                                                                                                                                                                                                                                                                                                                    |
|          | "oxaprozin" [Supplementary Concept]             | 4,5-diphenyl-2-oxazolepropionic acid; Danoprox; Wy-21,743; Dayrun; Rhoxal-oxaprozin; Apo-Oxaprozin; Daypro                                                                                                                                                                                                                                                                                                                                                                                    |
|          | "Piroxicam" [Mesh]                              | CP-16171; CP 16171; CP16171; Feldene                                                                                                                                                                                                                                                                                                                                                                                                                                                          |
|          | "Celecoxib" [Mesh]                              | 4-(5-(4-methylphenyl)-3-(trifluoromethyl)-1H-pyrazol-1-yl)benzenesulfonamide; Celebrex; SC 58635; 58635, SC; SC-58635; SC58635                                                                                                                                                                                                                                                                                                                                                                |
|          | "parecoxib" [Supplementary Concept]             | N-(((5-methyl-3-phenylisoxazol-4-yl)-phenyl)sulfonyl)propanamide; N-(((Me-P)-P)S P; parecoxib sodium; N-(((5-methyl-3-phenylisoxazol-4-yl)-phenyl)sulfonyl)propanamine, sodium salt; Dynastat                                                                                                                                                                                                                                                                                                 |
|          | "etoricoxib" [Supplementary Concept]            | L-791456; MK 0663; MK-0663; Arcoxia                                                                                                                                                                                                                                                                                                                                                                                                                                                           |
|          | "tenoxicam" [Supplementary Concept]             | 4-hydroxy-2-methyl-N-2-pyridyl-2H-thieno(2,3-e)-1,2-thiazine-3-carboxamide 1,1-dioxide; Ro 12-0068; Ro-12-0068; Reutenox; Artriunic; Novo-Tenoxicam; Mobiflex; Tilcotil; Apo-Tenoxicam                                                                                                                                                                                                                                                                                                        |
|          | "meloxicam" [Supplementary Concept]             | Reumoxicam; meloxicam; Movalis; Uticox; Mobic; Mobicox; Mobec; Masflex; Movicox; Parocin                                                                                                                                                                                                                                                                                                                                                                                                      |
|          | "Flurbiprofen" [Mesh]                           | Fluriproben; 2-Fluoro-alpha-methyl-(1,1'-biphenyl)-4-acetic Acid; Flurbiprofen; Apo-Flurbiprofen; Apo; Flurbiprofen; BTS-18322; BTS 18322; BTS18322; Cebutid; Dobrofen; E-7869; E 7869; E7869; Flugalin; Flurbiprofen Sodium; Sodium, Flurbiprofen; Froben; Froben SR; Neo Artrol; Novo-Flurprofen; Novo; Flurprofen; Nu-Flurbiprofen; Nu Flurbiprofen; Ocuflen; Ocuflur; ratio-Flurbiprofen; ratio Flurbiprofen; Strefen; Ansaïd                                                             |
|          | "tiaprofenic acid" [Supplementary Concept]      | FC 3001; Flanid; Pierre Fabre brand of tiaprofenic acid; tiaprofenic acid, calcium salt; Nu-Tiaprofenic; Nu-Pharm brand of tiaprofenic acid; PMS-Tiaprofenic; Pharmascience brand of tiaprofenic acid; RU 15060; Surgam; Grünenthal brand of tiaprofenic acid; Florizel brand of tiaprofenic acid; Hoechst brand of; tiaprofenic acid; Surgam SA; Aventis brand of tiaprofenic acid; Apo-Tiaprofenic; Apotex brand of tiaprofenic acid; Novo-Tiaprofenic; Novopharm brand of tiaprofenic acid |
|          | "Diflunisal" [Mesh]                             | Dolobid; Dolocid; Dolobis; Nu-Diflunisal; Nu Diflunisal; NuDiflunisal; MK-647; MK 647; MK647; Novo; Diflunisal; Novo Diflunisal; NovoDiflunisal; Apo-Diflunisal; Apo Diflunisal; ApoDiflunisal                                                                                                                                                                                                                                                                                                |
|          | "Etodolac" [Mesh]                               | "Etodolic Acid; Acid, Etodolic; Etodolac, (+)-Isomer; Etodolac, (-)-Isomer; Etodolac, (S)-Isomer; Ultradol; Etodolac, Monosodium Salt, (+) Isomer; Etodolac, Monosodium Salt, (S)-Isomer; Lodine; Ramodar; AY-24,236; AY 24,236; AY24,236; AY-24236; AY 24236; AY24236; Etodolac, Monosodium Salt"                                                                                                                                                                                            |
|          | "salicylsalicylic acid" [Supplementary Concept] | "disalicylic acid; salsalate; Argesic; Disalcid; Salsitab; Upsher-Smith brand of salicylsalicylic acid; Salflex; salicyl salicylate; Saloxium; Arcylate; Mono-Gesic"                                                                                                                                                                                                                                                                                                                          |
|          | "Sulindac" [Mesh]                               | "Apo-Sulin; Apo Sulin; Arthrobid; Clinoril; Arthrocine; Klinoril; Sulindal; Chibret; Kenalin; MK-231MK 231; MK231; Novo-Sundac; Novo Sundac; Nu-Sulindac; Nu Sulinda; Aclin; Copal"                                                                                                                                                                                                                                                                                                           |
|          | "Tolmetin" [Mesh]                               | "Tolectin; Tolmetin Sodium, Anhydrous; Anhydrous Tolmetin Sodium; Tolmetin Sodium Anhydrous; Anhydrous, Tolmetin Sodium; Sodium Anhydrous, Tolmetin; McN-2559; McN 2559; McN2559; Tolmetin Sodium; Sodium, Tolmetin; Tolmetin Sodium, Dihydrate; Dihydrate Tolmetin Sodium"                                                                                                                                                                                                                   |

**Supplementary Table 2.** Continued

| Headings        | Selection of Search Terms              |                                                                                                                                                                                                                                                                                                                                                                                                                                                                                                                                                                                                                                                                                                                                                                                                                                                                                                                                                                                                                                        |
|-----------------|----------------------------------------|----------------------------------------------------------------------------------------------------------------------------------------------------------------------------------------------------------------------------------------------------------------------------------------------------------------------------------------------------------------------------------------------------------------------------------------------------------------------------------------------------------------------------------------------------------------------------------------------------------------------------------------------------------------------------------------------------------------------------------------------------------------------------------------------------------------------------------------------------------------------------------------------------------------------------------------------------------------------------------------------------------------------------------------|
|                 | Mesh                                   | PubMed Entry Terms                                                                                                                                                                                                                                                                                                                                                                                                                                                                                                                                                                                                                                                                                                                                                                                                                                                                                                                                                                                                                     |
| Cox-2 inhibitor | “Cyclooxygenase 2 Inhibitors” [Mesh]   | “Inhibitors, Cyclooxygenase 2; Cyclooxygenase-2 Inhibitors; Inhibitors, Cyclooxygenase-2; Coxibs; COX-2 Inhibitors; COX 2 Inhibitors; Inhibitors, COX-2; COX2 Inhibitors; Inhibitors, COX2”                                                                                                                                                                                                                                                                                                                                                                                                                                                                                                                                                                                                                                                                                                                                                                                                                                            |
|                 | “Celecoxib” [Mesh]                     | “4-(5-(4-methylphenyl)-3-(trifluoromethyl)-1H-pyrazol-1-yl)benzenesulfonamide; Celebrex; SC 58635; 58635, SC; SC-58635; SC58635”                                                                                                                                                                                                                                                                                                                                                                                                                                                                                                                                                                                                                                                                                                                                                                                                                                                                                                       |
|                 | “parecoxib” [Supplementary Concept]    | “N-(((5-methyl-3-phenylisoxazol-4-yl)-phenyl)sulfonyl)propanamide; N-(((Me-P)-P)S)P; parecoxib sodium; N-(((5-methyl-3-phenylisoxazol-4-yl)-phenyl)sulfonyl)propanamine, sodium salt; Dynastat”                                                                                                                                                                                                                                                                                                                                                                                                                                                                                                                                                                                                                                                                                                                                                                                                                                        |
|                 | “etoricoxib” [Supplementary Concept]   | “L-791456; MK 0663; MK-0663; Arcoxia”                                                                                                                                                                                                                                                                                                                                                                                                                                                                                                                                                                                                                                                                                                                                                                                                                                                                                                                                                                                                  |
|                 | “Cyclooxygenase 2” [Mesh]              | “Cyclo-Oxygenase II; Cyclo Oxygenase II; PTGS2; PGHS-2; Prostaglandin H Synthase-2; Prostaglandin H Synthase 2; COX-2 Prostaglandin Synthase; COX 2 Prostaglandin Synthase; Prostaglandin Synthase, COX-2; Synthase, COX-2 Prostaglandin; Cyclooxygenase-2”                                                                                                                                                                                                                                                                                                                                                                                                                                                                                                                                                                                                                                                                                                                                                                            |
| PPI             | “Proton Pump Inhibitors” [Mesh]        | Inhibitors, Proton Pump                                                                                                                                                                                                                                                                                                                                                                                                                                                                                                                                                                                                                                                                                                                                                                                                                                                                                                                                                                                                                |
|                 | “Dexlansoprazole” [Mesh]               | “Lansoprazole, R-Isomer; Lansoprazole, R Isomer; R-Isomer Lansoprazole; 2-(((R)-((3-Methyl-4-(2,2,2-trifluoroethoxy)-2-pyridinyl)methyl)sulfinyl)-1H-benzimidazole; R-Lansoprazole; R Lansoprazole; Dexlansoprazole Sesquihydrate; TAK 390MR; TAK-390MR; TAK-390MR; TAK-390; TAK 390; TAK390; Dexilant; T-168390; T 168390; T168390”                                                                                                                                                                                                                                                                                                                                                                                                                                                                                                                                                                                                                                                                                                   |
|                 | “Esomeprazole” [Mesh]                  | “Esomeprazole Sodium; Esomeprazole Strontium; Strontium, Esomeprazole; Esomeprazole Magnesium; Nexium; AstraZeneca Brand of Esomeprazole Magnesium; Esomeprazole Potassium; Esomeprazole Strontium Anhydrous”                                                                                                                                                                                                                                                                                                                                                                                                                                                                                                                                                                                                                                                                                                                                                                                                                          |
|                 | “ilaprazole” [Supplementary Concept]   | “IY 81149; IY81149; IY-81149”                                                                                                                                                                                                                                                                                                                                                                                                                                                                                                                                                                                                                                                                                                                                                                                                                                                                                                                                                                                                          |
|                 | “Lansoprazole” [Mesh]                  | “Lansoprazol; 2-(((3-Methyl-4-(2,2,2-trifluoroethoxy)-2-pyridyl)methyl)sulfinyl)benzimidazole; Lansoprazoles; Bamalite; Tecnobio Brand of Lansoprazole; Lansoprazole Tecnobio Brand; Lansol; Lansoprazole Sodium; Sodium, Lansoprazole; Lanzor; Hoechst Brand of Lansoprazole; Lansoprazole; Hoechst Brand; Prezal; Monolium; Salvar Brand of Lansoprazole; Lansoprazole Salvar Brand; Opiren; Almirall Brand of Lansoprazole; Lansoprazole Almirall Brand; Prevacid; Ogestro; Abbot Brand of Lansoprazole; Lansoprazole Abbot Brand; TAP Brand of Lansoprazole; Lansoprazole TAP Brand; Pro Ulco; Vinas Brand of Lansoprazole; Lansoprazole Vinas Brand; Promeco; Promeco Brand of; Lansoprazole; Lansoprazole Promeco Brand; Takepron; Ulpax; Hormona Brand of Lansoprazole; Lansoprazole Hormona Brand; Zoton; Wyeth Brand of Lansoprazole; Lansoprazole Wyeth Brand; Lederle Brand of Lansoprazole; Lansoprazole Lederle Brand; AG 1749; AG-1749; AG1749; Agopton; Ogest; Takeda Brand of Lansoprazole; Lansoprazole Takeda Brand” |
|                 | “Omeprazole” [Mesh]                    | “Prilosec; Omeprazole Sodium; Sodium, Omeprazole; H 168-68; H 168 68; H 16868; Omeprazole Magnesium; Magnesium, Omeprazole”                                                                                                                                                                                                                                                                                                                                                                                                                                                                                                                                                                                                                                                                                                                                                                                                                                                                                                            |
|                 | “pantoprazole” [Supplementary Concept] | “SK and F 96022; SKF-96022; SK and F-96022; Protonix; BY 1023; BY-1023; pantoprazole sodium”                                                                                                                                                                                                                                                                                                                                                                                                                                                                                                                                                                                                                                                                                                                                                                                                                                                                                                                                           |
|                 | “Rabeprazole” [Mesh]                   | “2-(((4-(3-methoxypropoxy)-3-methylpyridin-2-yl)methyl)sulfinyl)-1H-benzimidazole; Dexrabeprazole; E 3810; E3810; Pariet; Rabeprazole Sodium; Sodium, Rabeprazole; 1H-Benzimidazole, 2-(((4-(3-methoxypropoxy)-3-methyl-2-pyridinyl)methyl)sulfinyl)-, Sodium Salt; Aciphex; LY-307640; LY 307640; LY307640”                                                                                                                                                                                                                                                                                                                                                                                                                                                                                                                                                                                                                                                                                                                           |

**Supplementary Table 2.** Continued

| Headings           | Selection of Search Terms                |                                                                                                                                                                                                                                                                                                                                                                                                                                                                     |
|--------------------|------------------------------------------|---------------------------------------------------------------------------------------------------------------------------------------------------------------------------------------------------------------------------------------------------------------------------------------------------------------------------------------------------------------------------------------------------------------------------------------------------------------------|
|                    | Mesh                                     | PubMed Entry Terms                                                                                                                                                                                                                                                                                                                                                                                                                                                  |
| Misoprostol        | "Misoprostol" [Mesh]                     | "Novo-Misoprostol; Novo Misoprostol; SC-29333; SC 29333; SC29333; SC-30249; SC 30249; SC30249; Apo-Misoprostol; Apo Misoprostol; Misoprostol, (11beta,13E,16R)-Isomer; Glefos; Misoprostol, (11alpha,13E)-Isomer; Misoprostol, (11alpha,13E,16R)-Isomer; Misoprostol, (11alpha,13Z)-(+)-Isomer; Misoprostol, (11alpha.13E,16S)-Isomer; Misoprostol, (11beta,13E)-(+)-Isomer; Misoprostol, (11beta,13E,16S)-Isomer; Cytotec"                                         |
| H2-RA              | "Histamine H2 Antagonists" [Mesh]        | "Receptor Blockaders, H2; Blockaders, Histamine H2 Receptor; Histamine H2 Receptor Blockaders<br>Histamine H2 Blockers; Blockers, Histamine H2; H2 Blockers, Histamine; Receptor Antagonists, Histamine H2; Histamine H2 Receptor Antagonists; Antagonists, Histamine H2; H2 Antagonists, Histamine; H2 Receptor Blockaders; Blockaders, H2 Receptor; Antihistaminics, H2; H2 Antihistaminics"                                                                      |
|                    | "Famotidine" [Mesh]                      | "YM-11170; YM 11170; YM11170; Pepcid; Famotidine Hydrochloride; MK-208; MK 208; MK208"                                                                                                                                                                                                                                                                                                                                                                              |
|                    | "Cimetidine" [Mesh]                      | "Biomet; Biomet400; Cimetidine Hydrochloride; Hydrochloride, Cimetidine; Cimetidine HCl; HCl, Cimetidine; Histodil; SK and F-92334; SK and F 92334; SK and F92334; SKF-92334; SKF 92334; SKF92334; Tagamet; Altramet; Eureceptor"                                                                                                                                                                                                                                   |
|                    | "Ranitidine" [Mesh]                      | "Ranitidin; N (2-(((5-((Dimethylamino)methyl)-2-furanyl)methyl)thio)ethyl)-N'-methyl-2-nitro-1,1-ethenediamine; Biotidin; Ranisen; Sostril; Zantac; Zantic; AH-19065; AH 19065; AH19065; Ranitidine Hydrochloride; Hydrochloride, Ranitidine"                                                                                                                                                                                                                       |
|                    | "Nizatidine" [Mesh]                      | "N-(2-(((2-((Dimethylamino)methyl)-4-thiazolyl)methyl)thio)ethyl)-N'-methyl-2-nitro-1,1-ethenediamine; LY-139037; LY 139037; LY139037; Axid"                                                                                                                                                                                                                                                                                                                        |
|                    | "lafutidine" [Supplementary Concept]     | "N-(4-(4-piperidinylmethyl)pyridyl-2-oxy)butenyl-2-(furfurylsulfinyl)acetamide; N-(4-(4-piperidinylmethyl)pyridyl-2-oxy)-(Z)-butenyl-2-(furfurylsulfinyl)acetamide; FRG-8813; FRG 8813"                                                                                                                                                                                                                                                                             |
| Antiplatelet agent | "Aspirin" [Mesh]                         | "Acetylsalicylic Acid; Acid, Acetylsalicylic; 2-(Acetyloxy)benzoic Acid; Acylpyrin; Aloxiprimum; Colfarit; Dispril; Easprin; Ecotrin; Endosprin; Magnecyl; Micristin; Polopirin; Polopiryna; Solprin; Solupsan; Zorprin; Acetysal"                                                                                                                                                                                                                                  |
|                    | "clopidogrel" [Supplementary Concept]    | "clopidogrel napadisilate; clopidogrel, (+)(S)-isomer; Iscover; PCR 4099; PCR-4099; clopidogrel-Mepha; SC 25989C; SC 25990C; SR 25989; clopidogrel besylate; clopidogrel besilate; clopidogrel hydrochloride; clopidogrel Sandoz; clopidogrel bisulfate; Plavix"                                                                                                                                                                                                    |
|                    | "Ticlopidine" [Mesh]                     | "Ticlopidine Hydrochloride; Hydrochloride, Ticlopidine; Ticlodix; Ticlodone; 53-32C; 53 32C; 5332C; Ticlid"                                                                                                                                                                                                                                                                                                                                                         |
|                    | "Platelet Aggregation Inhibitors" [Mesh] | "Aggregation Inhibitors, Platelet; Inhibitors, Platelet Aggregation; Blood Platelet Antiaggregants; Antiaggregants, Blood Platelet; Platelet Antiaggregants; Antiaggregants, Platelet; Blood Platelet; Aggregation Inhibitors; Platelet Inhibitors; Inhibitors, Platelet; Antiplatelet Agents; Agents, Antiplatelet; Antiplatelet Drugs; Drugs, Antiplatelet; Platelet Antagonists; Antagonists, Platelet; Blood Platelet Antagonists; Antagonists, Blood Platelet" |

**Supplementary Table 2.** Continued

| Headings                   | Selection of Search Terms           |                                                                                                                                                                                                                                                                                                                                                                                                    |
|----------------------------|-------------------------------------|----------------------------------------------------------------------------------------------------------------------------------------------------------------------------------------------------------------------------------------------------------------------------------------------------------------------------------------------------------------------------------------------------|
|                            | Mesh                                | PubMed Entry Terms                                                                                                                                                                                                                                                                                                                                                                                 |
| Anticoagulant              | “Rivaroxaban” [Mesh]                | “5-chloro-N-(((5S)-2-oxo-3-(4-(3-oxomorpholin-4-yl)phenyl)-1,3-oxazolidin-5-yl)methyl)thiophene-2-carboxamide; Xarelto; BAY 59-7939; BAY 59 7939; BAY 597939”                                                                                                                                                                                                                                      |
|                            | “edoxaban” [Supplementary Concept]  | “N-(5-chloropyridin-2-yl)-N'-((1S,2R,4S)-4-(N,N-dimethylcarbamoyl)-2-(5-methyl-4,5,6,7-tetrahydro(1,3)thiazolo(5,4-c)pyridine-2-carboxamido)cyclohexyl)oxamide; N-(5-chloropyridin-2-yl)-N'-((1S,2R,4S)-4-(N,N-dimethylcarbamoyl)-2-(5-methyl-4,5,6,7-tetrahydrothiazolo(5,4-c)pyridine-2-carboxamido)cyclohexyl)ethanediamide p-toluenesulfonate monohydrate; DU-176b; DU-176; edoxaban tosylate” |
|                            | “Dabigatran” [Mesh]                 | “N-((2-(((4-(aminoiminomethyl)phenyl)amino)methyl)-1-methyl-1H-benzimidazol-5-yl)carbonyl)-N-2-pyridinyl-beta-alanine; BIBR 1048; Pradaxa; Dabigatran Etxilate; Etxilate, Dabigatran; Dabigatran Etxilate Mesylate; Etxilate Mesylate, Dabigatran; Mesylate, Dabigatran Etxilate”                                                                                                                  |
|                            | “apixaban” [Supplementary Concept]  | “BMS 562247; BMS562247; BMS-562247”                                                                                                                                                                                                                                                                                                                                                                |
|                            | “Warfarin” [Mesh]                   | “4-Hydroxy-3-(3-oxo-1-phenylbutyl)-2H-1-benzopyran-2-one; Apo-Warfarin; Al-documar; Gen-Warfarin; Warfant; Coumadin; Marevan; Warfarin Potassium; Potassium, Warfarin; Warfarin Sodium; Sodium, Warfarin; Coumadine; Tedicumar”                                                                                                                                                                    |
|                            | “Anticoagulants” [Mesh]             | “Anticoagulation Agents; Agents, Anticoagulation; Anticoagulant Agents; Agents, Anticoagulant; Anticoagulant Drugs; Drugs, Anticoagulant; Anticoagulant; Indirect Thrombin Inhibitors; Inhibitors, Indirect Thrombin; Thrombin Inhibitors, Indirect”                                                                                                                                               |
| Peptic ulcer hemorrhage    | “Peptic ulcer” [Mesh]               | Peptic Ulcers; Ulcer, Peptic; Ulcers, Peptic; Gastroduodenal Ulcer; Gastroduodenal Ulcers; Ulcer, Gastroduodenal; Ulcers, Gastroduodenal; Marginal Ulcer; Marginal Ulcers; Ulcer, Marginal; Ulcers, Marginal                                                                                                                                                                                       |
|                            | “Stomach Ulcer” [Mesh]              | Stomach Ulcers; Ulcer, Stomach; Ulcers, Stomach; Gastric Ulcer; Gastric Ulcers; Ulcer, Gastric; Ulcers, Gastric                                                                                                                                                                                                                                                                                    |
|                            | “Duodenal Ulcer” [Mesh]             | Ulcer, Duodenal; Ulcers, Duodenal; Curling Ulcer; Ulcer, Curling; Curling's Ulcer; Curlings Ulcer                                                                                                                                                                                                                                                                                                  |
|                            | “Gastrointestinal emorrhage” [Mesh] | Hemorrhage, Gastrointestinal; Gastrointestinal Hemorrhages; Hematochezia; Hematochezias                                                                                                                                                                                                                                                                                                            |
|                            | “Peptic Ulcer Hemorrhage” [Mesh]    | Hemorrhage, Peptic Ulcer; Peptic Ulcer Hemorrhages; Ulcer Hemorrhage, Peptic                                                                                                                                                                                                                                                                                                                       |
| <i>Helicobacter pylori</i> | ‘Helicobacter pylori’ [Mesh]        | Helicobacter; Gastrospirillum; Campylobacter pylori                                                                                                                                                                                                                                                                                                                                                |

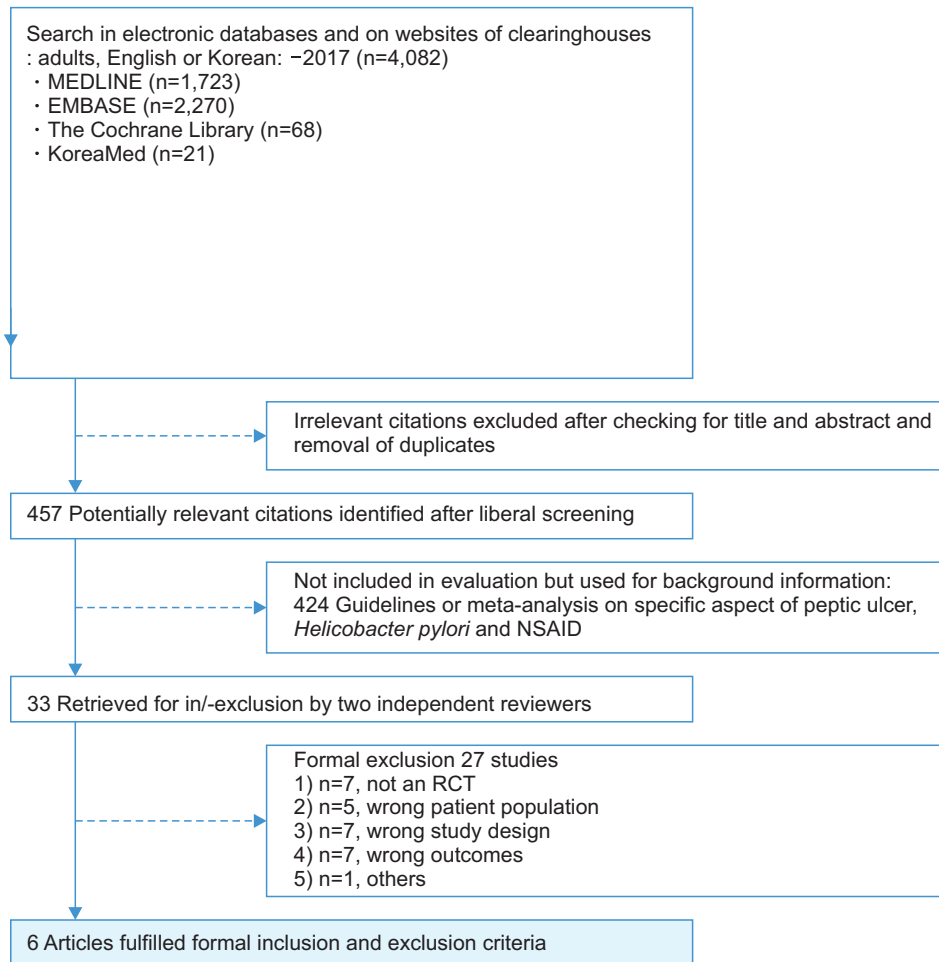

**Supplementary Fig. 1.** Flowchart of study selection for preventive effect on peptic ulcer by *Helicobacter pylori* eradication in NSAID users. NSAID, nonsteroidal anti-inflammatory drug; RCT, randomized controlled trial.

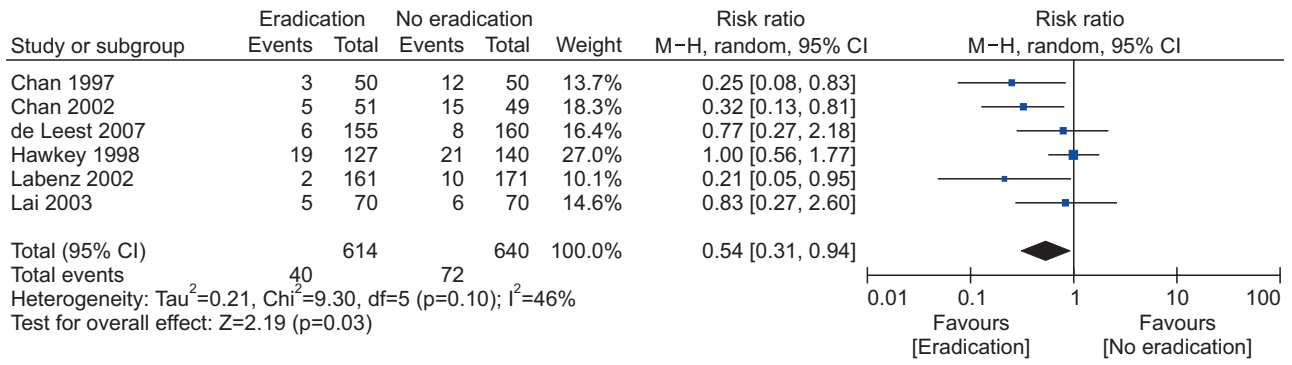

**Supplementary Fig. 2.** Preventive effect on peptic ulcer by *Helicobacter pylori* eradication in long-term NSAID users: overall group. NSAID, nonsteroidal anti-inflammatory drug; CI, confidence interval; M-H, Mantel Haenszel.



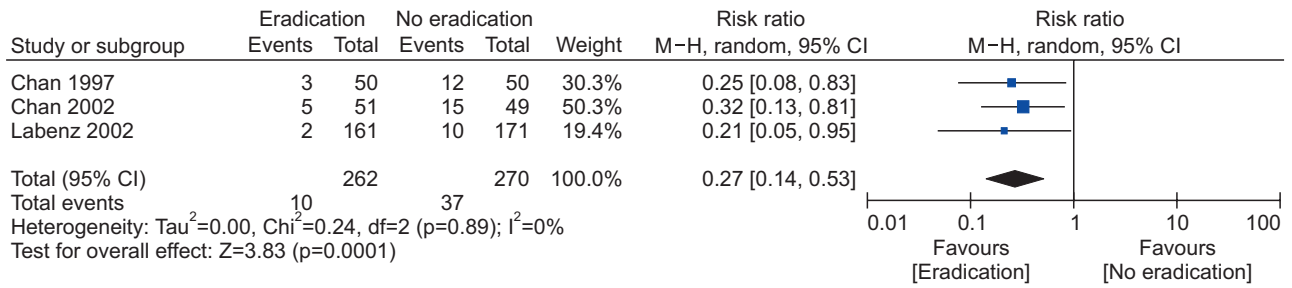

**Supplementary Fig. 3.** Preventive effect on peptic ulcer by *Helicobacter pylori* eradication in long-term NSAID users: NSAID-naïve patients. NSAID, nonsteroidal anti-inflammatory drug; CI, confidence interval; M-H, Mantel Haenszel.

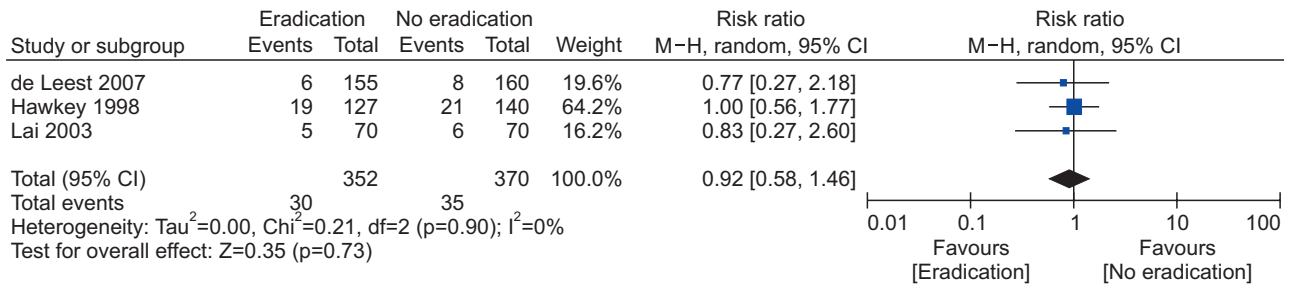

**Supplementary Fig. 4.** Preventive effect on peptic ulcer by *Helicobacter pylori* eradication in long-term NSAID users: chronic NSAID users. NSAID, nonsteroidal anti-inflammatory drug; CI, confidence interval; M-H, Mantel Haenszel.

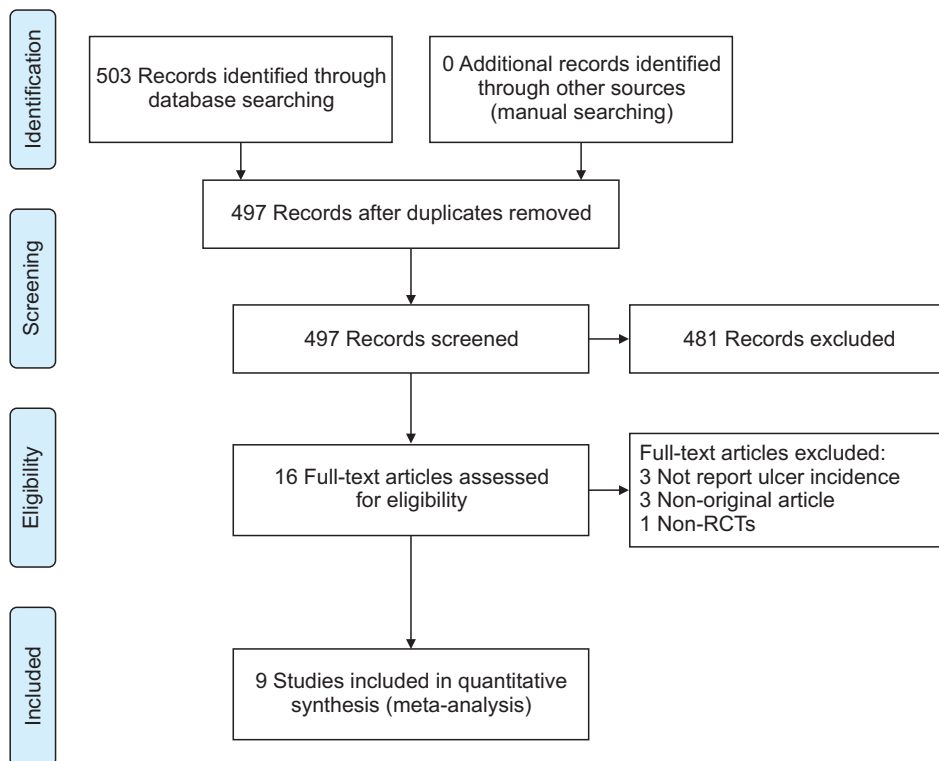

**Supplementary Fig. 5.** Flowchart of study selection for preventive effect on peptic ulcer by proton pump inhibitors in NSAID users. NSAID, nonsteroidal anti-inflammatory drug; RCT, randomized controlled trial.

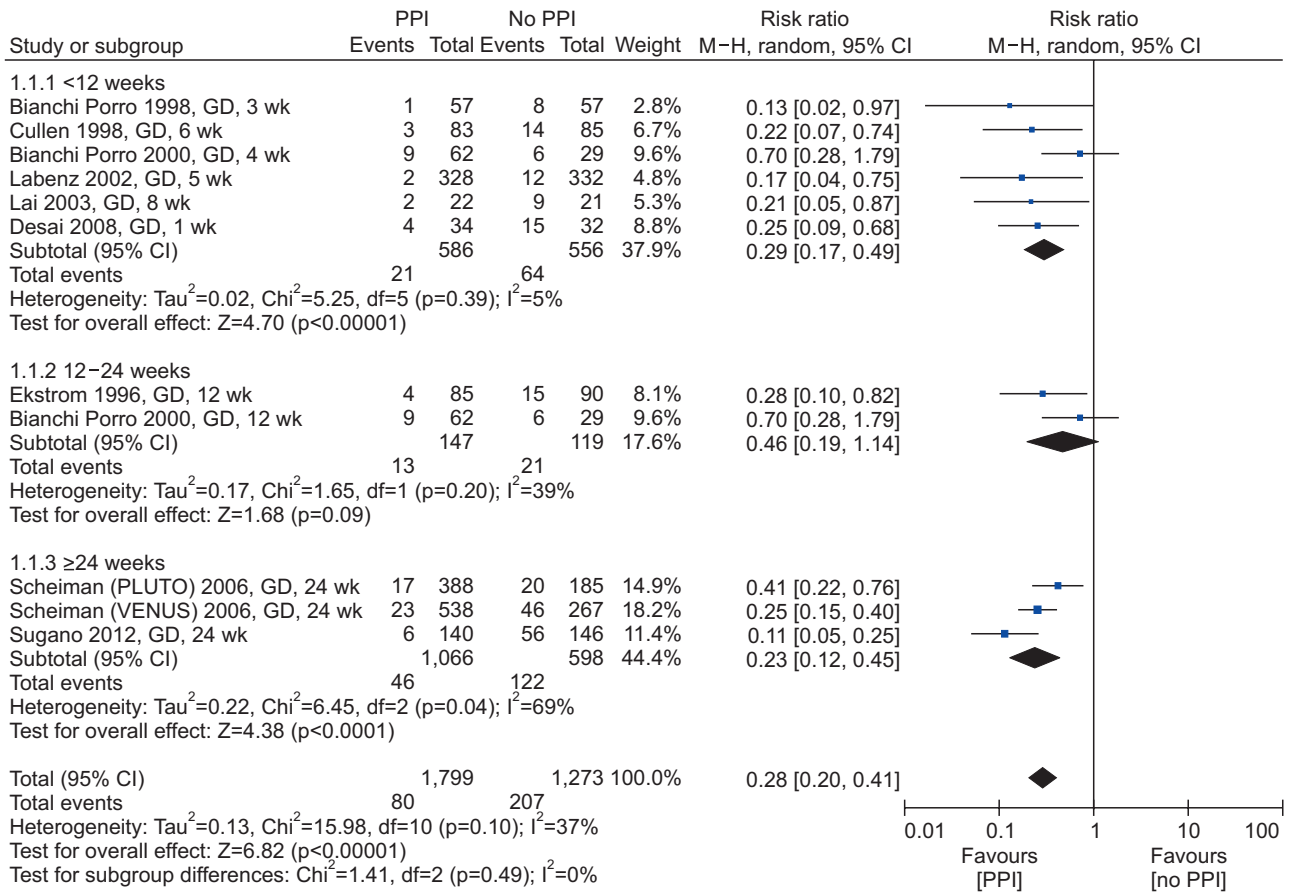

**Supplementary Fig. 6.** The prevention effect of PPIs for gastroduodenal ulcer in long-term NSAID users. Forest plot, PPI versus placebo (subgroup analysis by assessment timing).

NSAID, nonsteroidal anti-inflammatory drug; PPI, proton-pump inhibitor; CI, confidence interval; M-H, Mantel Haenszel.

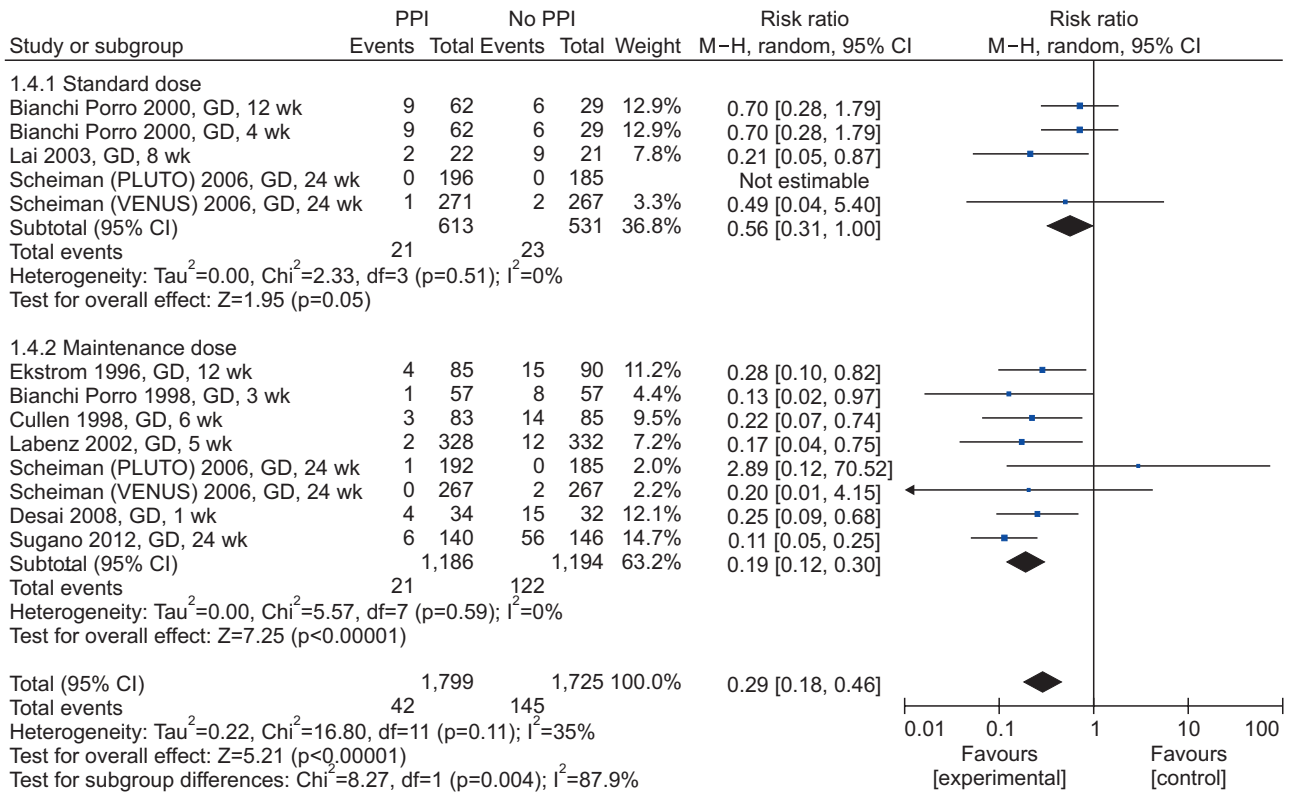

**Supplementary Fig. 7.** The prevention effect of proton pump inhibitors for gastroduodenal ulcer in long-term NSAID users according to dosage of proton pump inhibitors. Forest plot, PPI versus placebo (subgroup analysis by PPI dosage). NSAID, nonsteroidal anti-inflammatory drug; PPI, proton-pump inhibitor; CI, confidence interval; M-H, Mantel Haenszel.

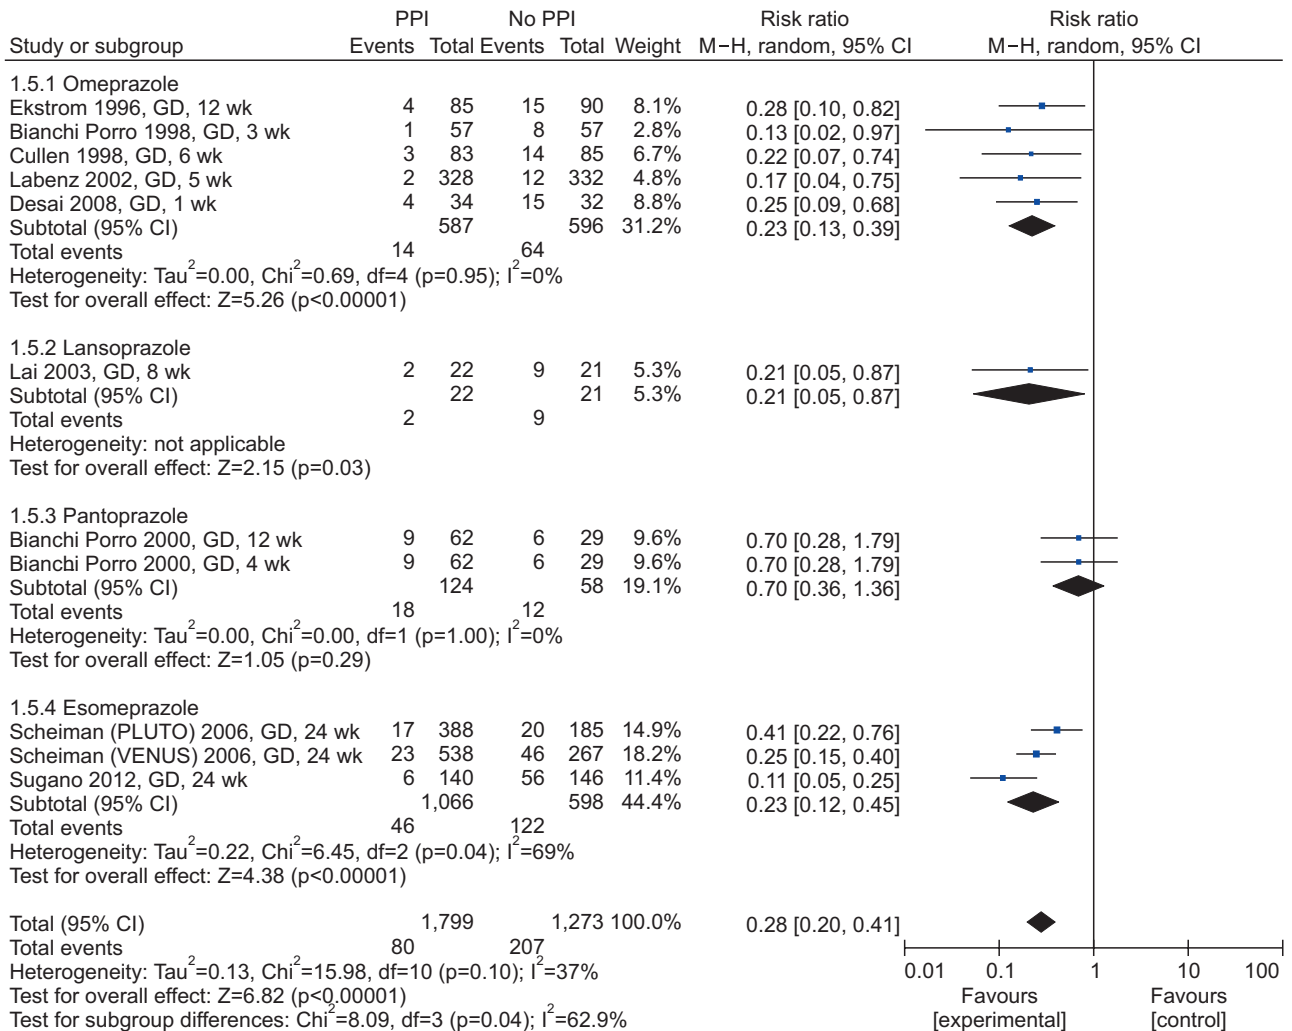

**Supplementary Fig. 8.** The prevention effect of proton pump inhibitors for gastroduodenal ulcer in long-term NSAID users according to type of proton pump inhibitors. Forest plot, PPI versus placebo (subgroup analysis by type of PPIs). NSAID, nonsteroidal anti-inflammatory drug; PPI, proton-pump inhibitor; CI, confidence interval; M-H, Mantel Haenszel.

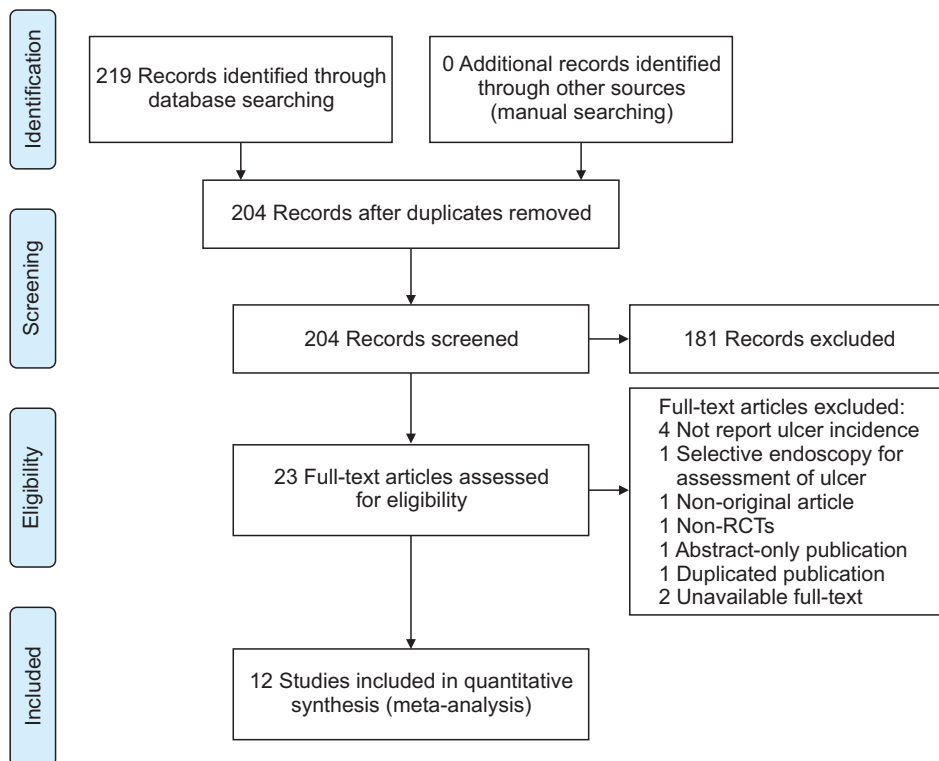

**Supplementary Fig. 9.** Flowchart of study selection for preventive effect on peptic ulcer by misoprostol in NSAID users. NSAID, nonsteroidal anti-inflammatory drug; RCT, randomized controlled trial.

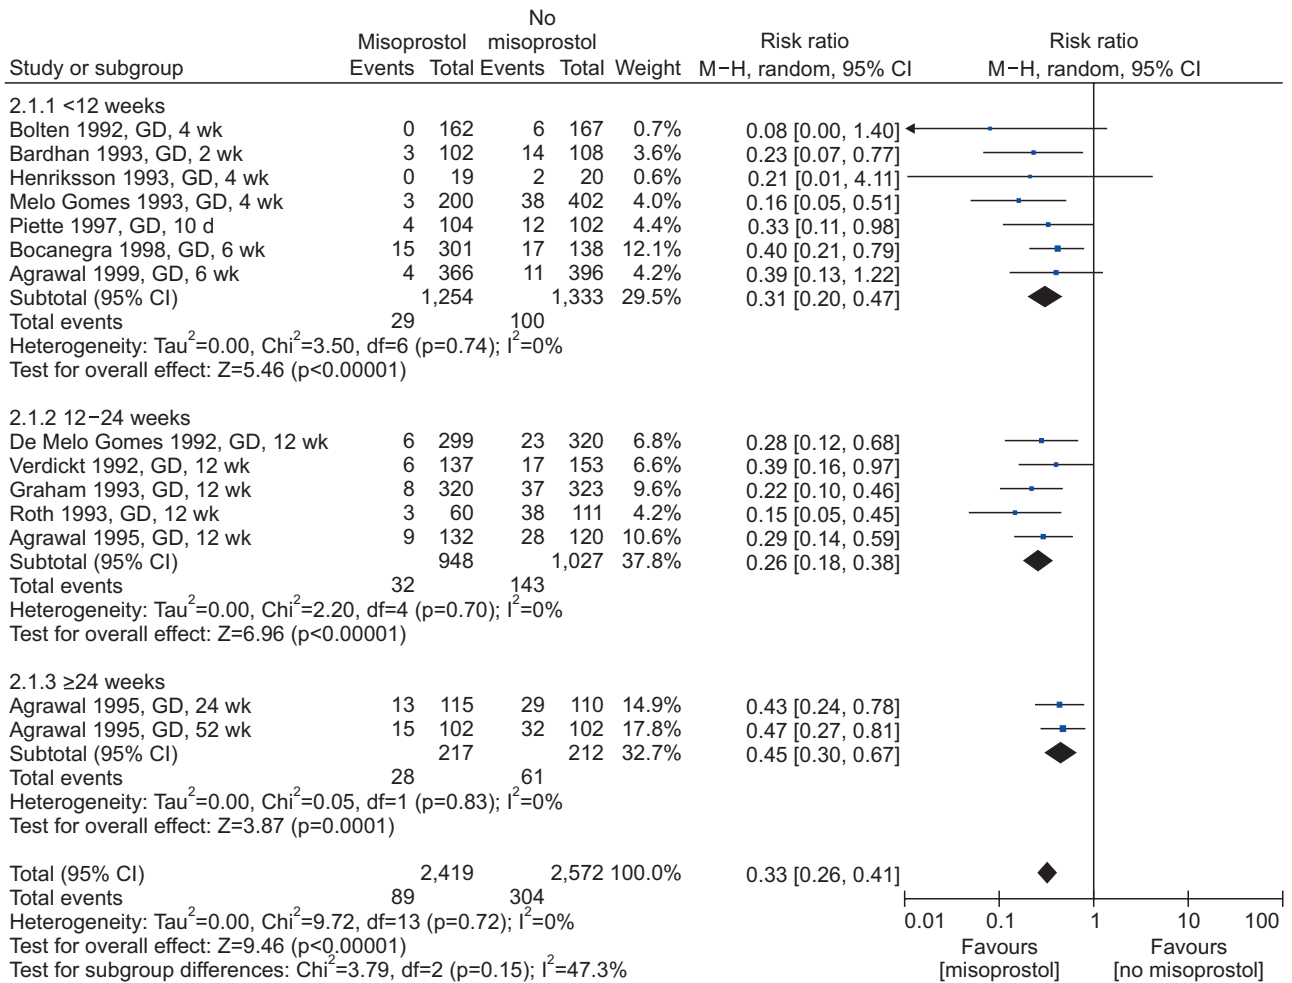

**Supplementary Fig. 10.** The prevention effect of misoprostol for gastroduodenal ulcer in long-term NSAID users. Forest plot, misoprostol versus placebo (subgroup analysis by assessment timing). NSAID, nonsteroidal anti-inflammatory drug; CI, confidence interval; M-H, Mantel Haenszel.



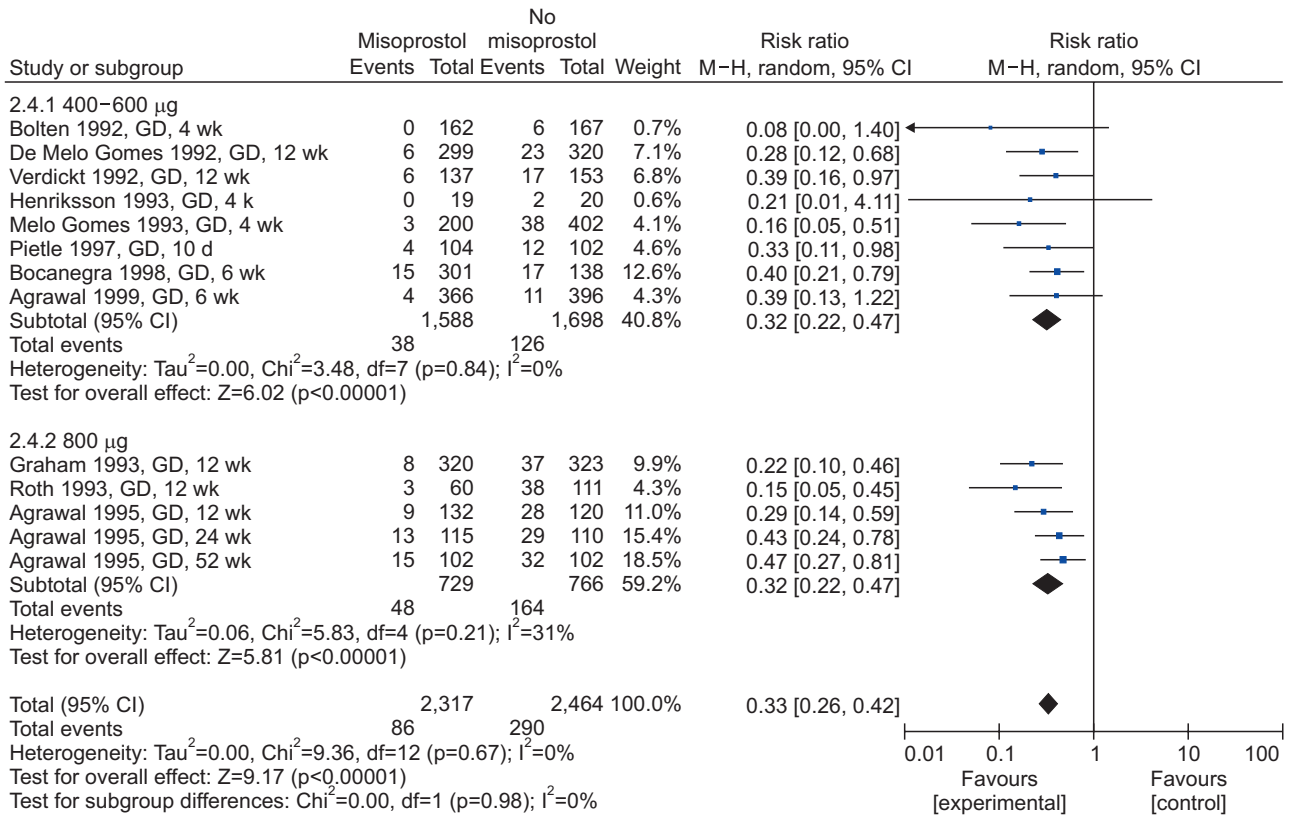

**Supplementary Fig. 11.** The prevention effect of misoprostol for gastroduodenal ulcer in long-term NSAID users according to dosage of misoprostol. Forest plot, misoprostol versus placebo (subgroup analysis by misoprostol dosage). NSAID, nonsteroidal anti-inflammatory drug; CI, confidence interval; M-H, Mantel Haenszel.

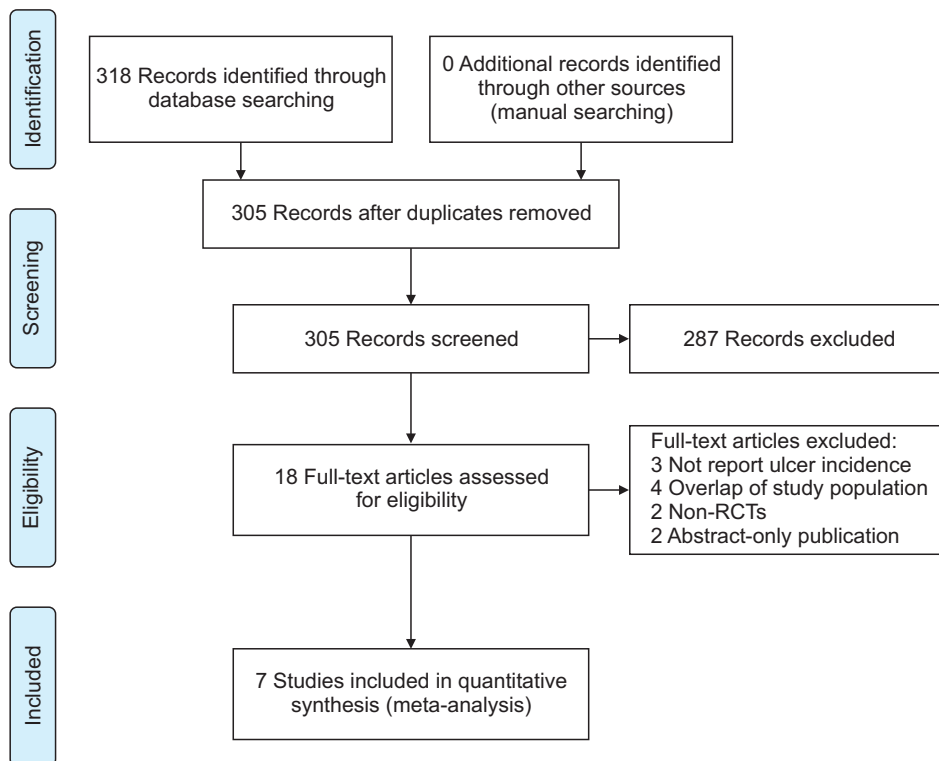

**Supplementary Fig. 12.** Flowchart of study selection for preventive effect on peptic ulcer by histamine 2 receptor antagonist in NSAID users. NSAID, nonsteroidal anti-inflammatory drug; RCT, randomized controlled trial.

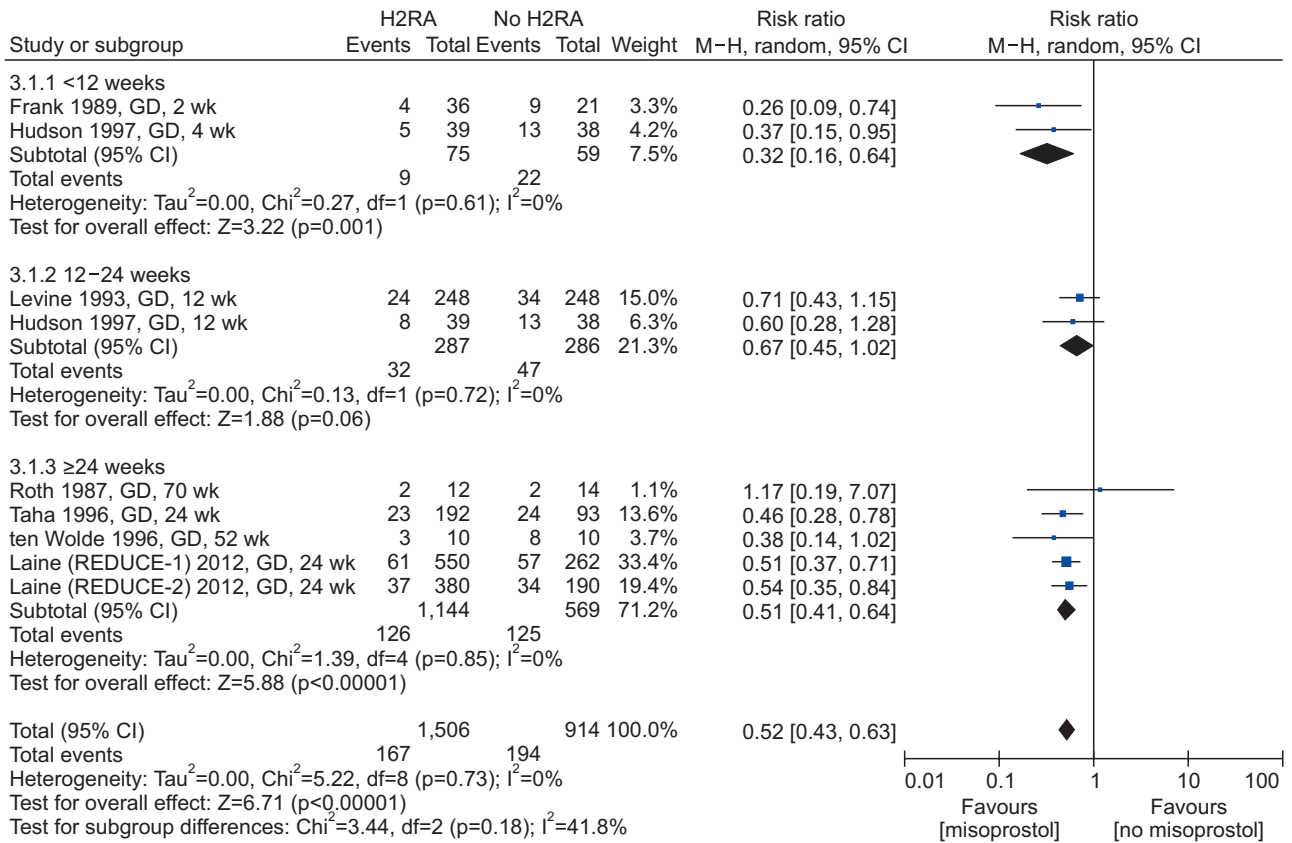

**Supplementary Fig. 13.** The prevention effect of H2RA for gastroduodenal ulcer in long-term NSAID users. Forest plot, H2RA versus placebo (subgroup analysis by assessment timing).

NSAID, nonsteroidal anti-inflammatory drug; H2RA, histamine-2 receptor antagonist; CI, confidence interval; M-H, Mantel Haenszel.

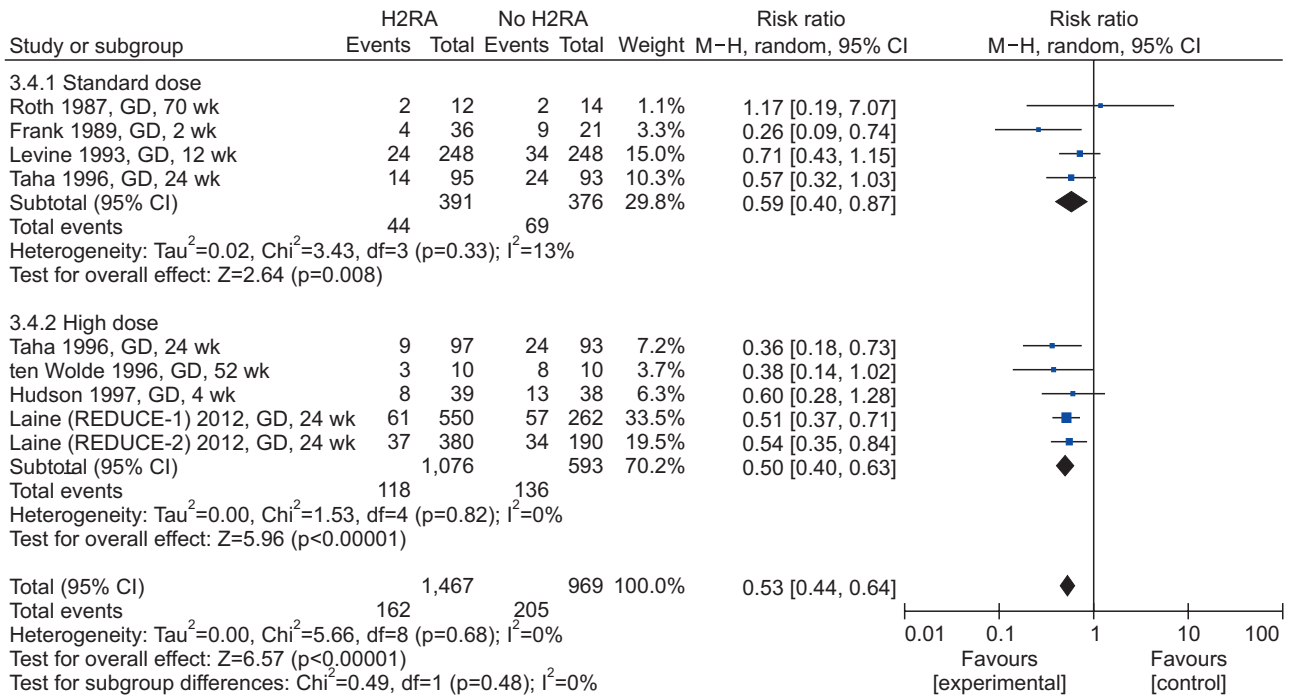

**Supplementary Fig. 14.** The prevention effect of H2RA for gastroduodenal ulcer in long-term NSAID users according to dosage of H2RA. Forest plot, H2RA versus placebo (subgroup analysis by H2RA dosage).

NSAID, nonsteroidal anti-inflammatory drug; H2RA, histamine-2 receptor antagonist; CI, confidence interval; M-H, Mantel Haenszel.

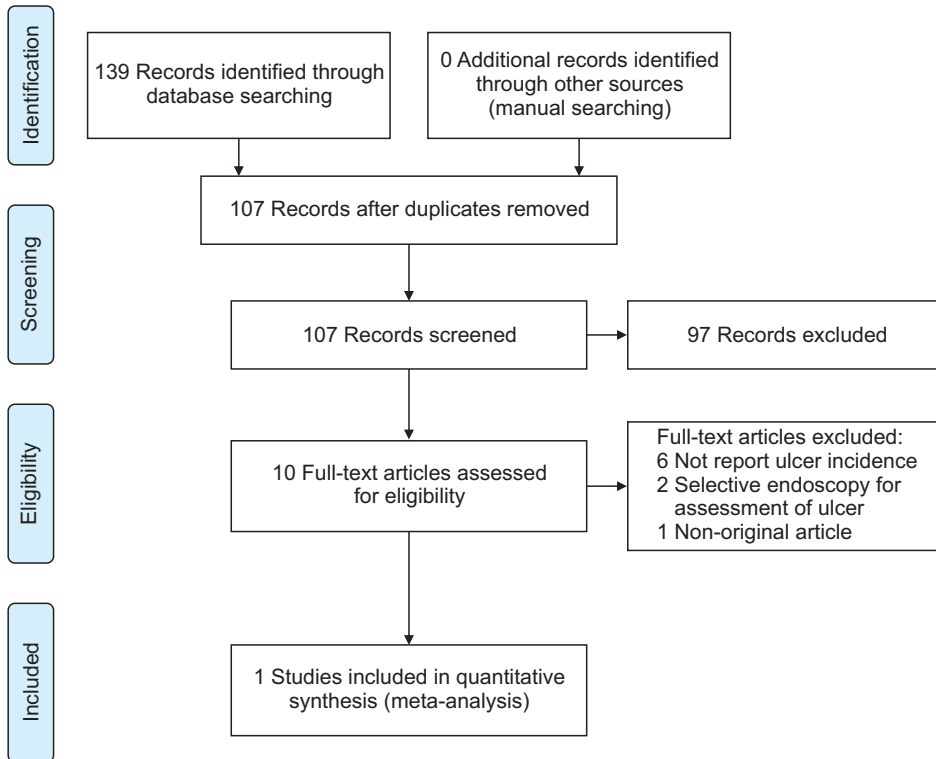

**Supplementary Fig. 15.** Flowchart of study selection for preventive effect on peptic ulcer between selective COX-2 inhibitors and nonselective COX inhibitors plus PPIs in NSAID users. COX, cyclooxygenase; PPI, proton pump inhibitor; NSAID, nonsteroidal anti-inflammatory drug.

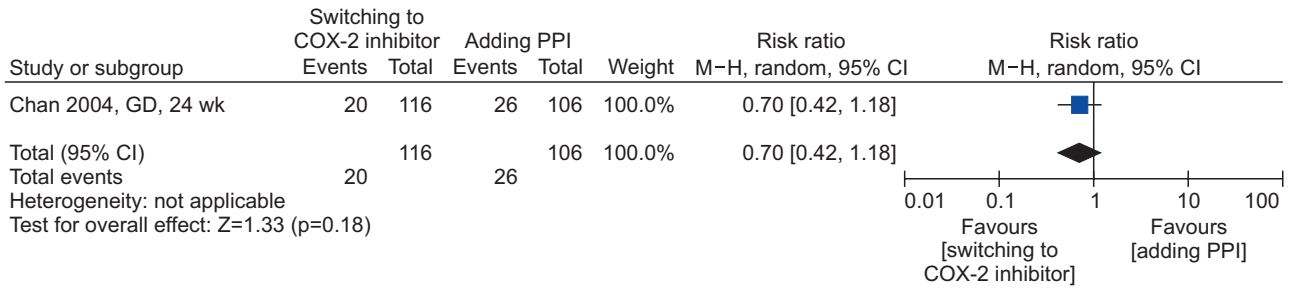

**Supplementary Fig. 16.** The prevention effect for gastroduodenal ulcer between selective COX-2 inhibitors and nonselective COX inhibitors plus PPIs. Forest plot, COX-2 versus nonselective COX + PPI.

NSAID, nonsteroidal anti-inflammatory drug; COX, cyclooxygenase; PPI, proton pump inhibitor; CI, confidence interval; M-H, Mantel Haenszel.

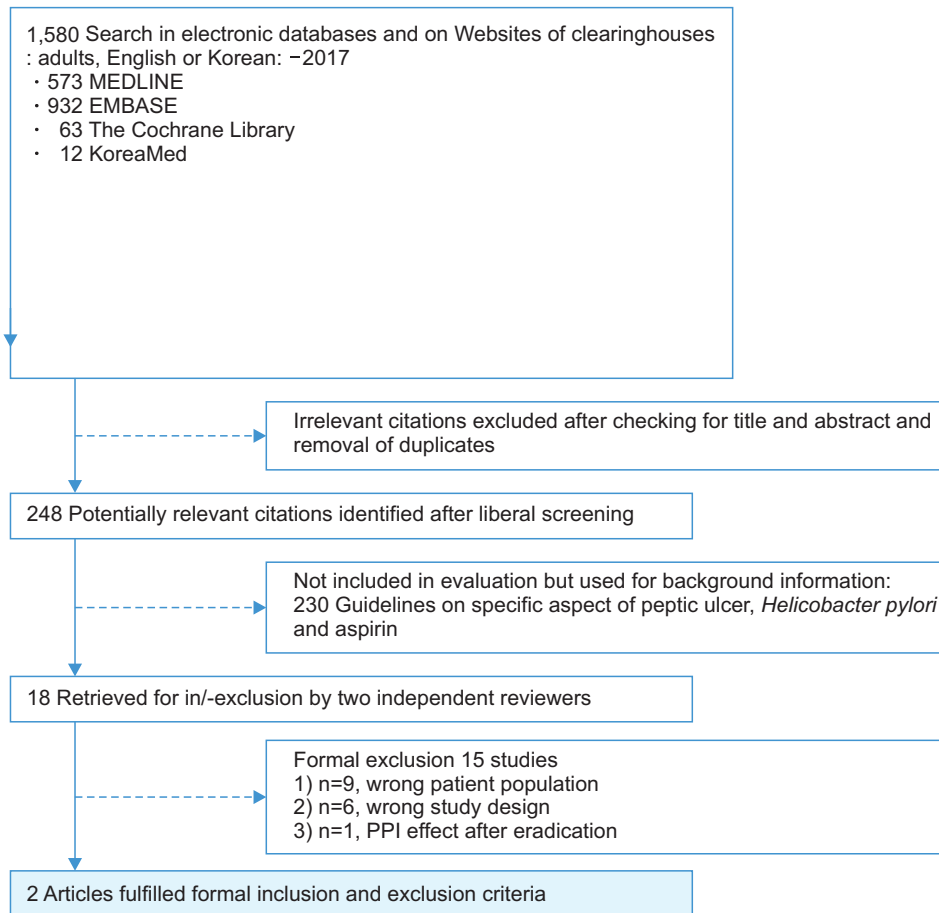

**Supplementary Fig. 17.** Flowchart of study selection for preventive effect of complications on peptic ulcer by *Helicobacter pylori* eradication in low dose aspirin users.

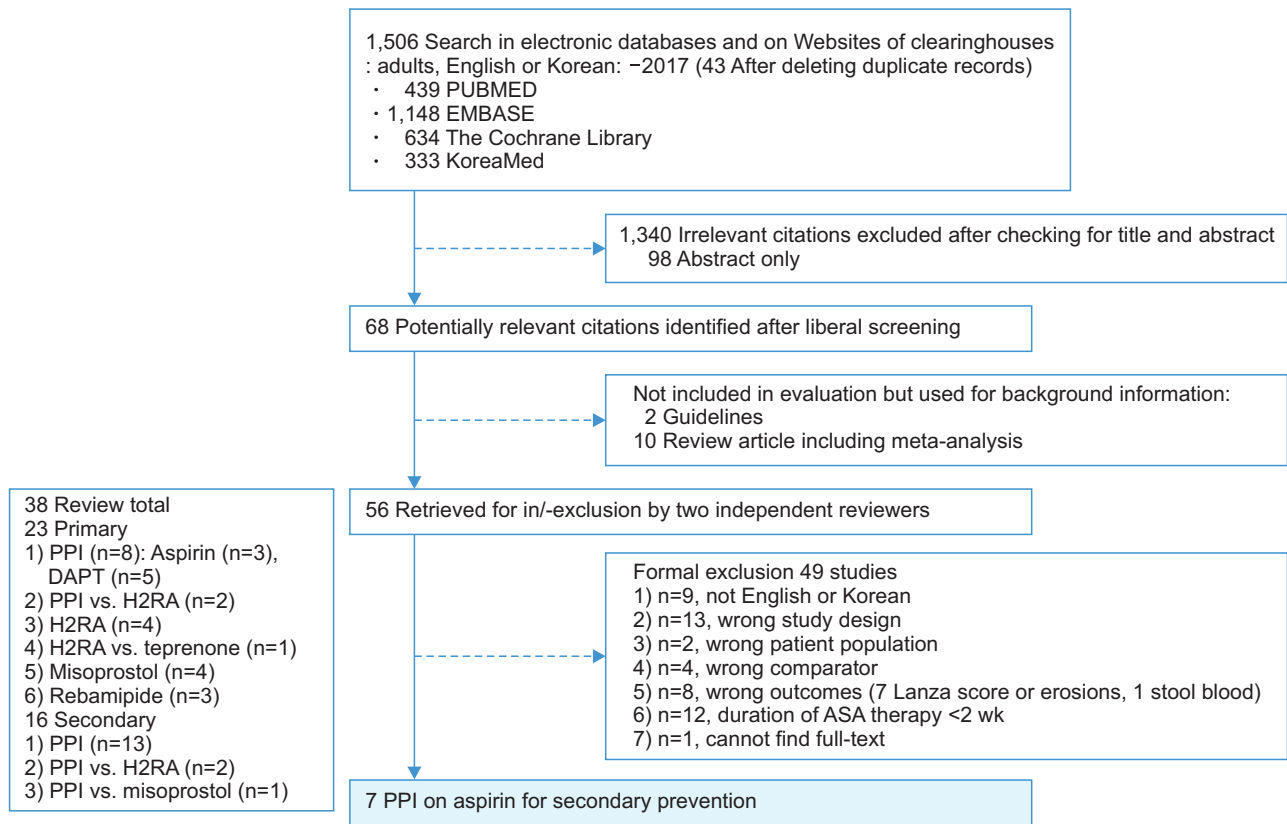

**Supplementary Fig. 18.** Flowchart of study selection for preventive effect of complications on peptic ulcer by PPI in long-term aspirin users. PPI, proton pump inhibitor; DAPT, dual antiplatelet therapy; H2RA, H2 receptor antagonist; PPI, proton pump inhibitor.



**A**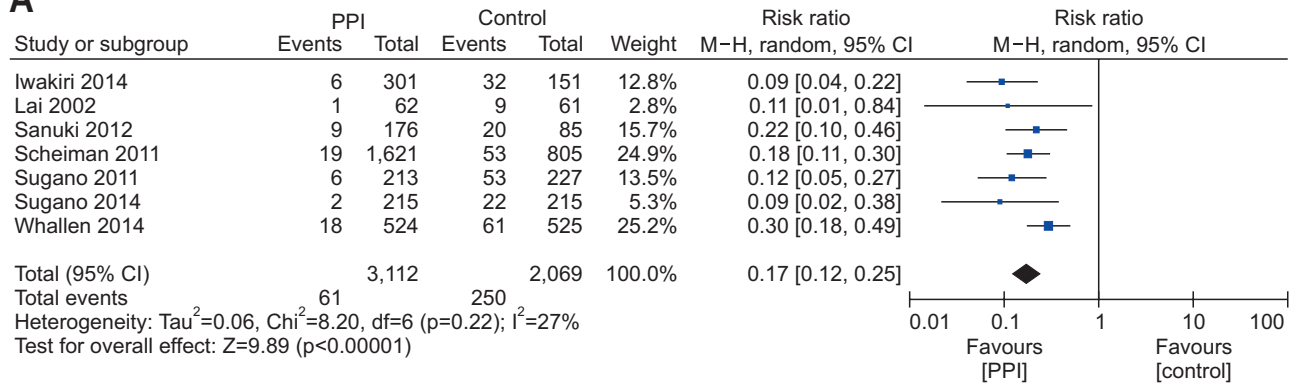**B**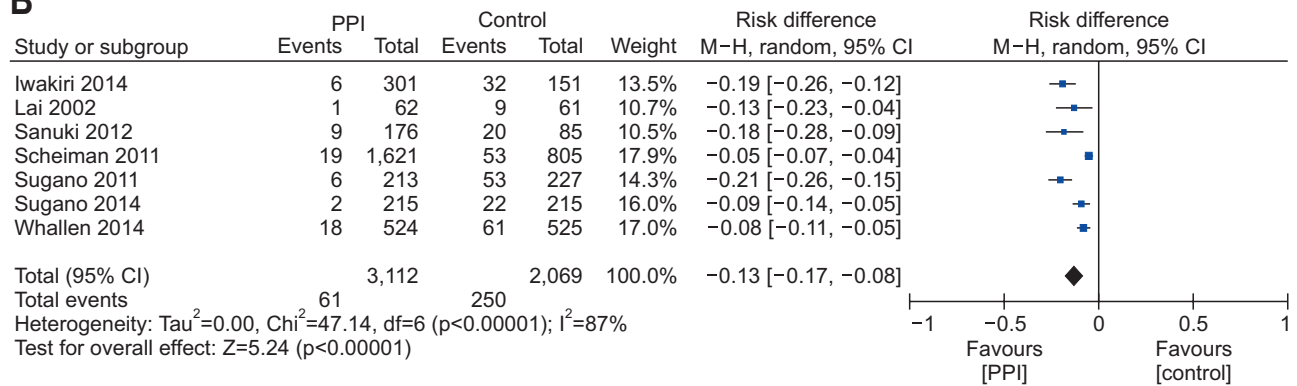

**Supplementary Fig. 19.** The preventive effect of PPIs for peptic ulcer in long-term aspirin users. (A) Odds ratio. (B) Risk difference. PPI, proton pump inhibitor; CI, confidence interval; M-H, Mantel Haenszel.

**A**

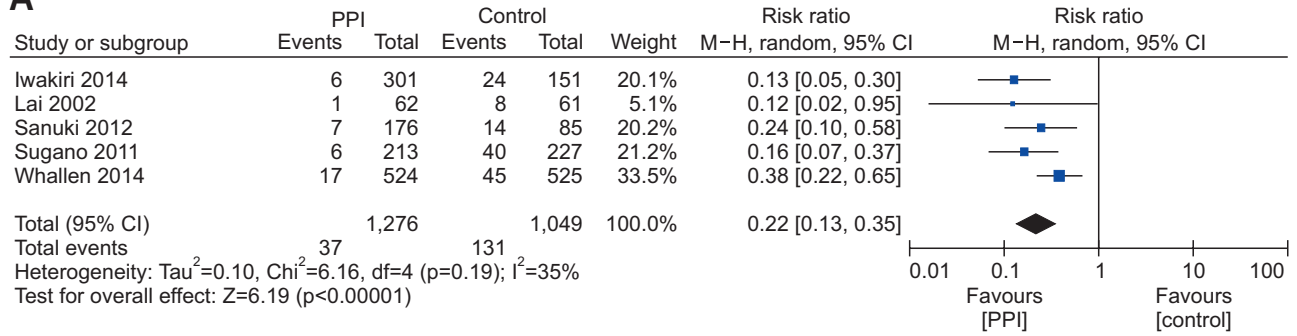

**B**

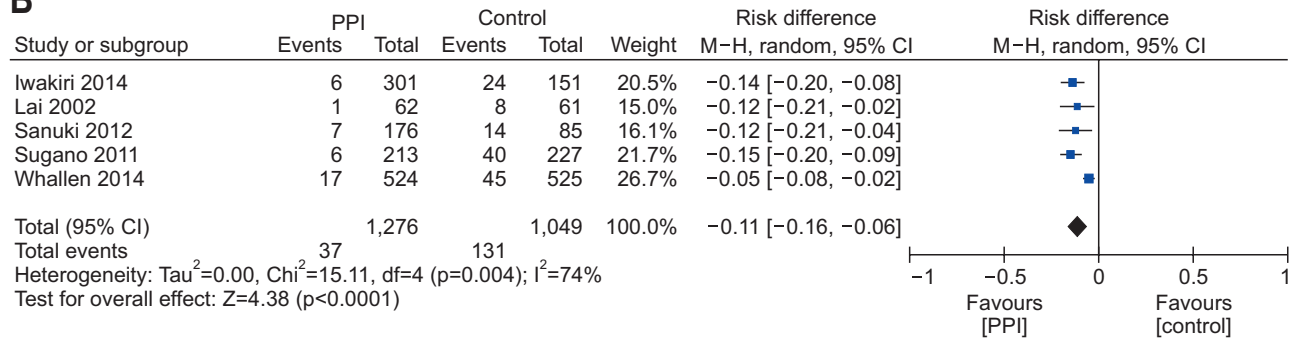

**Supplementary Fig. 20.** The preventive effect of PPIs for gastric ulcer in long-term aspirin users. (A) Odds ratio. (B) Risk difference. PPI, proton pump inhibitor; CI, confidence interval; M-H, Mantel Haenszel.

**A**

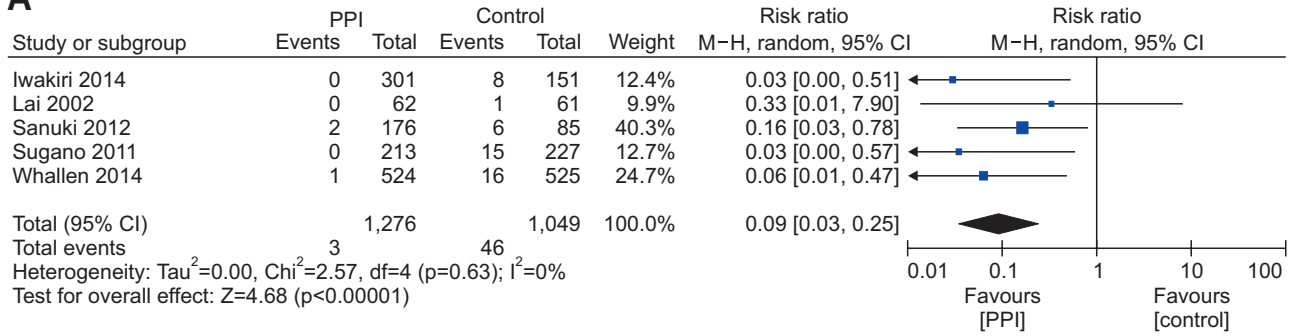

**B**

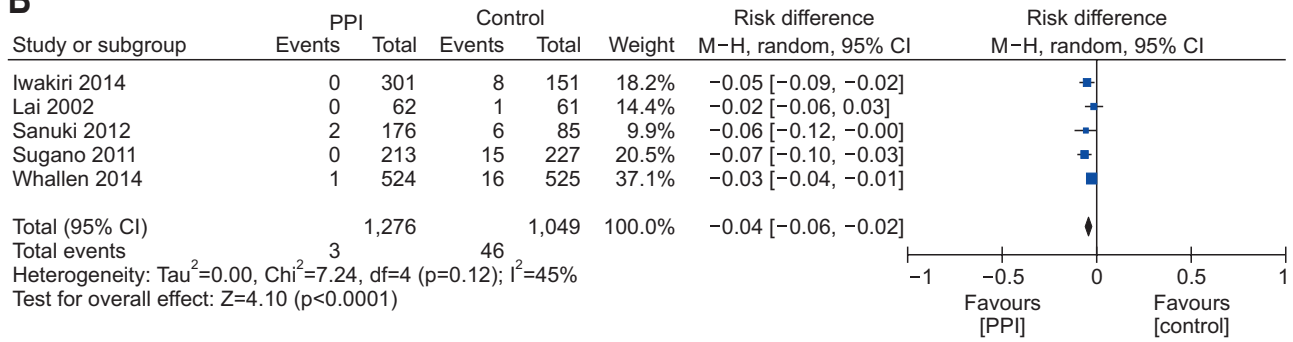

**Supplementary Fig. 21.** The preventive effect of PPIs for duodenal ulcer in long-term aspirin users. (A) Odds ratio. (B) Risk difference. PPI, proton pump inhibitor; CI, confidence interval; M-H, Mantel Haenszel.

**A**

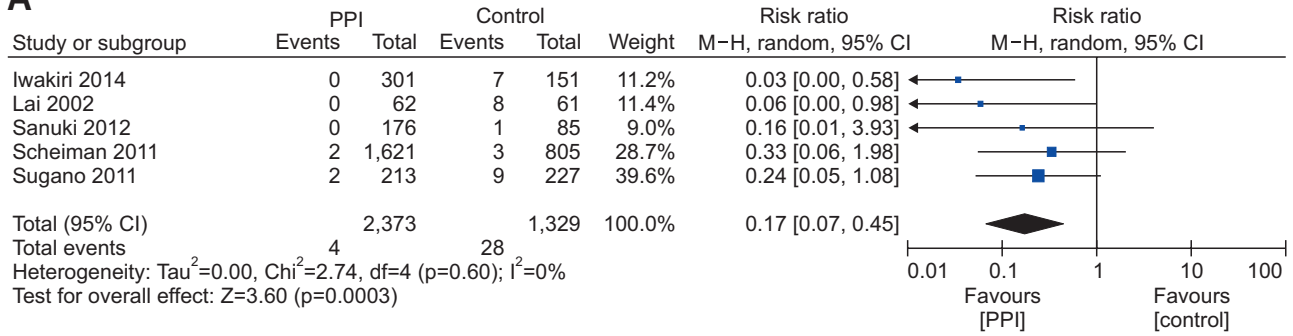

**B**

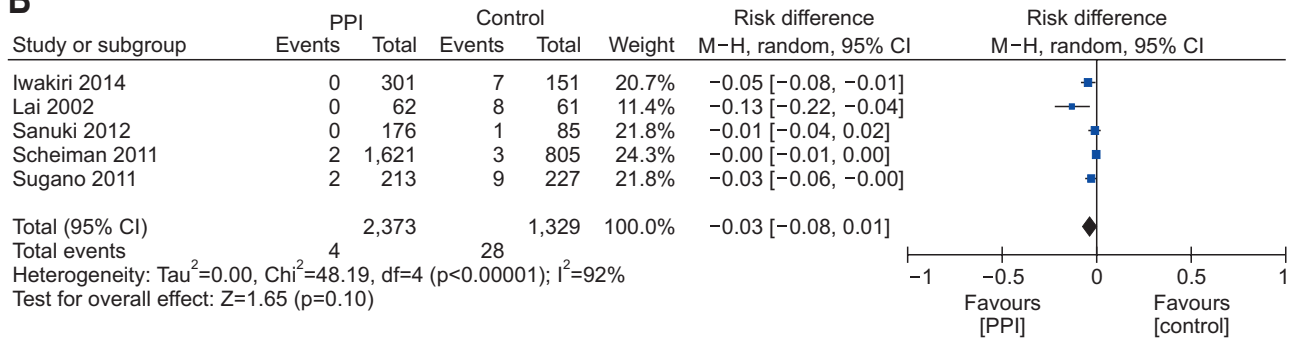

**Supplementary Fig. 22.** The preventive effect of PPIs for peptic ulcer bleeding in long-term aspirin users. (A) Odds ratio. (B) Risk difference. PPI, proton pump inhibitor; CI, confidence interval; M-H, Mantel Haenszel.

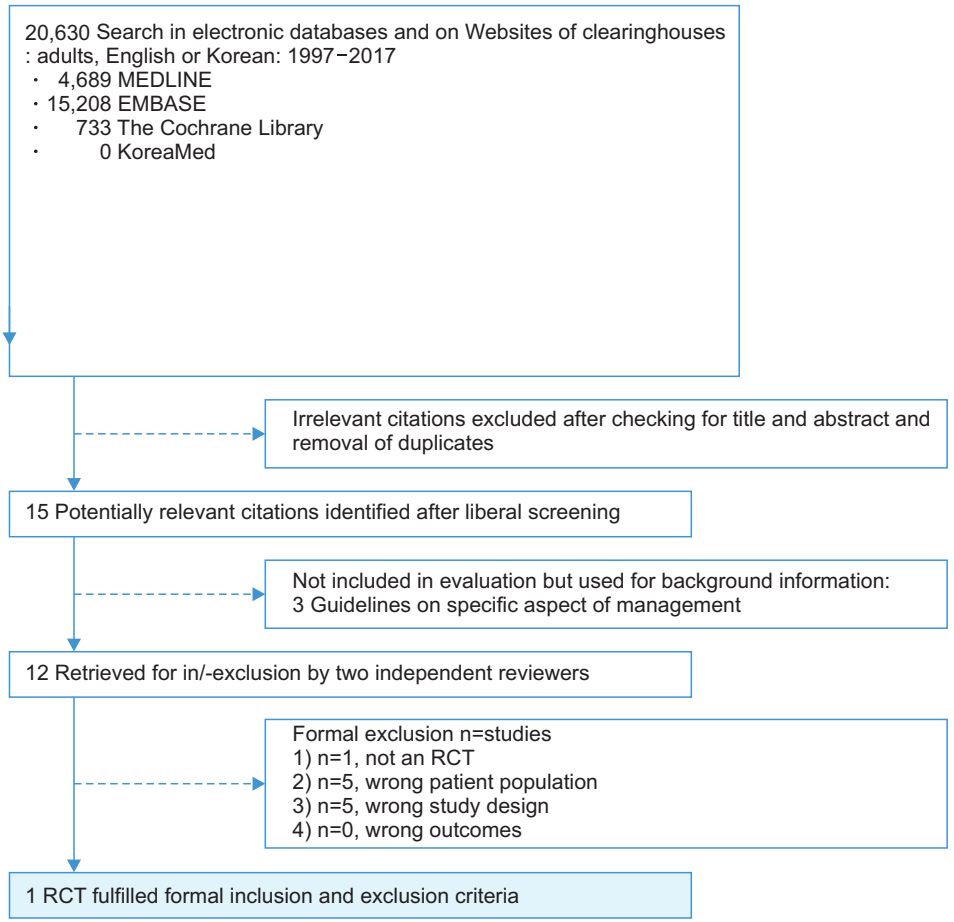

**Supplementary Fig. 23.** Flowchart of study selection for restarting of antiplatelet agent in antiplatelet user with peptic ulcer bleeding. RCT, randomized controlled trial.

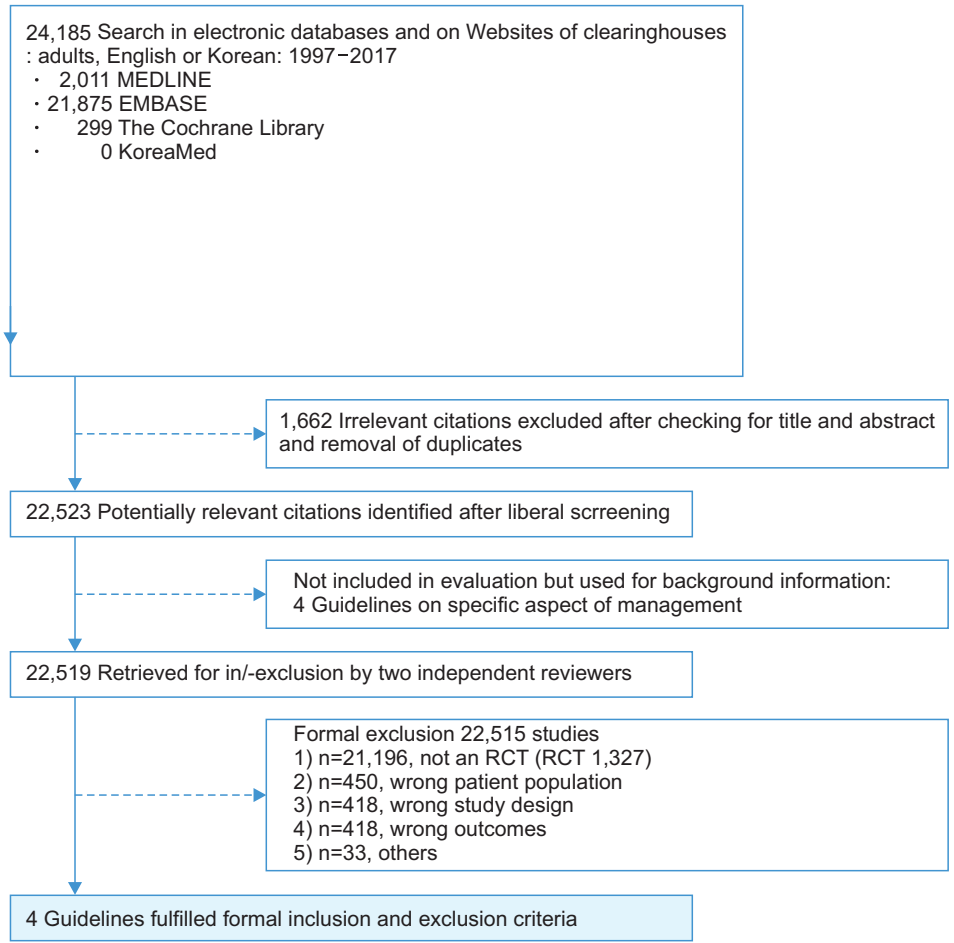

**Supplementary Fig. 24.** Flowchart of guideline selection for restarting of anticoagulant in long-term anticoagulant user with peptic ulcer bleeding.  
RCT, randomized controlled trial.

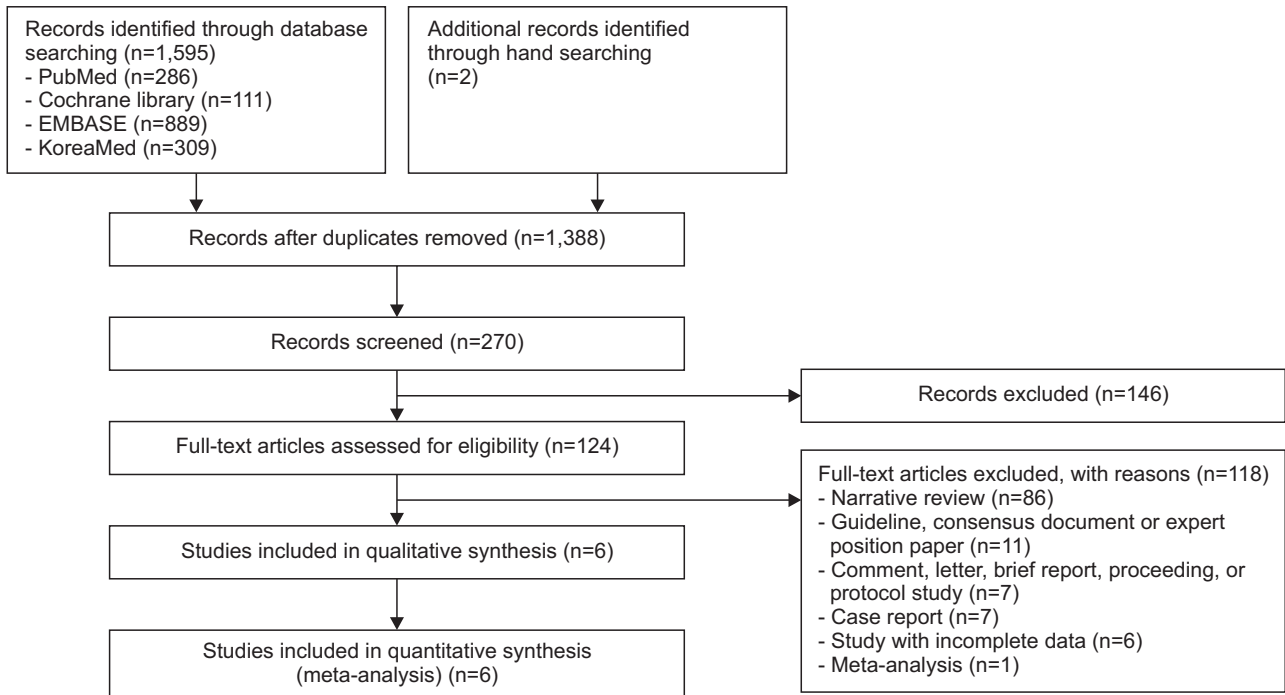

**Supplementary Fig. 25.** Flowchart of study selection for preventive effect on peptic ulcer bleeding by combination of antiulcer agent in anticoagulant users.

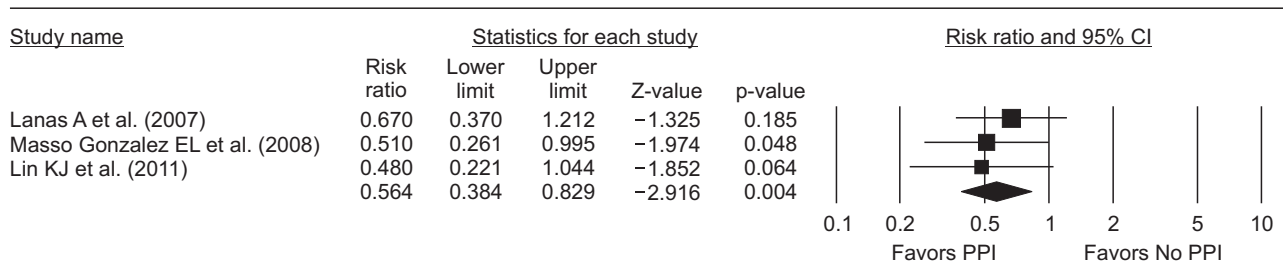

Heterogeneity:  $X^2=0.577$ ,  $df=2$  ( $p=0.749$ );  $I^2=0\%$   
 Test for overall effect:  $Z=-2.916$  ( $p=0.004$ )

**Supplementary Fig. 26.** Proton pump inhibitor and dicumarinic-related upper gastrointestinal bleeding. The size of each square is proportional to the study's weight. Diamond is the summary estimate from the pooled studies (random effect model). PPI, proton-pump inhibitor; CI, confidence interval.



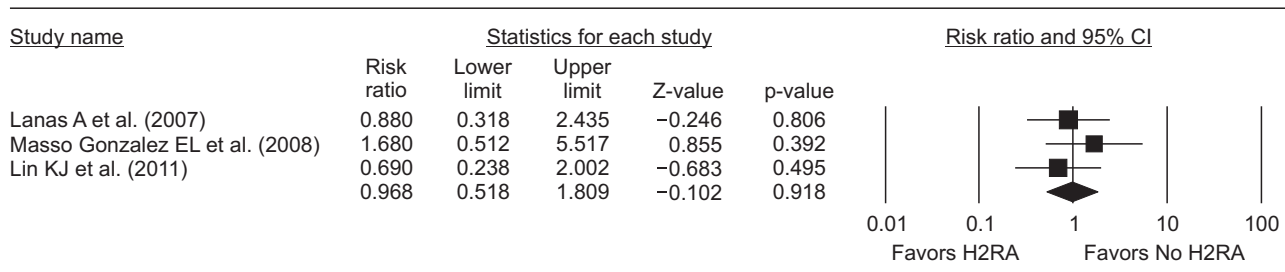

Heterogeneity:  $X^2=1.248$ ,  $df=2$  ( $p=0.536$ );  $I^2=0\%$   
 Test for overall effect:  $Z=-0.102$  ( $p=0.918$ )

**Supplementary Fig. 27.** H2RA and dicumarinic-related upper gastrointestinal bleeding. The size of each square is proportional to the study's weight. Diamond is the summary estimate from the pooled studies (random effect model). H2RA, histamine-2 receptor antagonist; CI, confidence interval.

## A

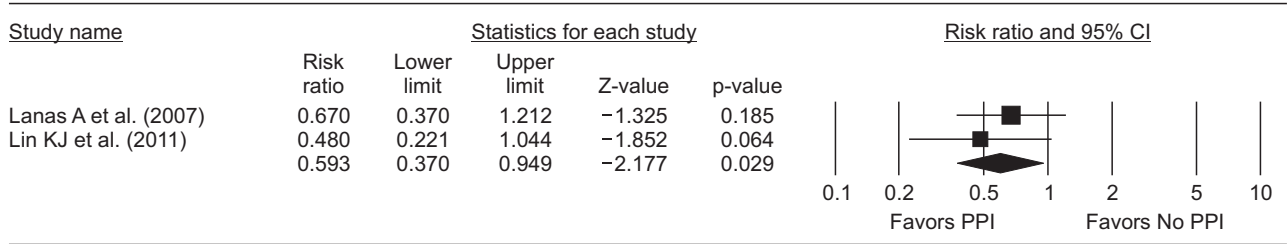

## B

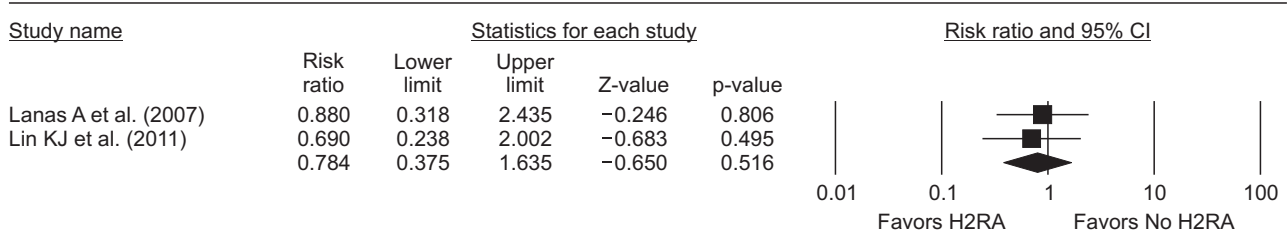

**Supplementary Fig. 28.** Sensitivity analysis according to the modifier. (A) PPI and dicumarinic-related upper GIB excluding study by Massó González EL *et al.* (B) H2RA and dicumarinic-related upper GIB excluding study by Massó González EL *et al.* The size of each square is proportional to the study's weight. Diamond is the summary estimate from the pooled studies (random effect model). PPI, proton-pump inhibitor; GIB, gastrointestinal bleeding; H2RA, histamine-2 receptor antagonist; CI, confidence interval.

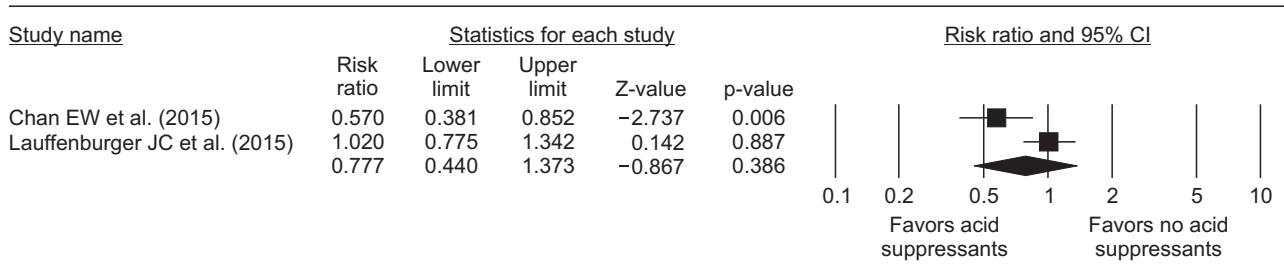

Heterogeneity:  $X^2=5.483$ ,  $df=1$  ( $p=0.019$ );  $I^2=81.761\%$   
 Test for overall effect:  $Z=-0.867$  ( $p=0.386$ )

**Supplementary Fig. 29.** Acid suppressants on dabigatran-related gastrointestinal bleeding. The size of each square is proportional to the study's weight. Diamond is the summary estimate from the pooled studies (random effect model). CI, confidence interval.
